# Supplementary material for: CRISPR screens reveal genetic determinants of PARP inhibitor sensitivity and resistance in prostate cancer
Source: PubMed Central journal article supplement (PMC9845315; doi:10.1038/s41467-023-35880-y), 2023-01-17
Supplement: 41467_2023_35880_MOESM2_ESM.pdf [file 41467_2023_35880_MOESM2_ESM.pdf]

**Title:** Supplementary Data 1:

**Description:** Genetic alterations of DNA damage response (DDR) genes in prostate cancer cell lines (Exome sequencing data)

**Title:** Supplementary Data 2:

**Description:** Genes identified from negative selection (CRISPR screen data)

**Title:** Supplementary Data 3:

**Description:** Common negatively selected genes (CRISPR screen data)

**Title:** Supplementary Data 4:

**Description:** Genes identified from positive selection (CRISPR screen data)

**Title:** Supplementary Data 5:

**Description:** Common positively selected genes (CRISPR screen data)

**Title:** Supplementary Data 6:

**Description:** Olaparib upregulated genes (RNA-seq data)

**Title:** Supplementary Data 7:

**Description:** Materials (antibodies, small molecule inhibitors, kits, cell lines, siRNA sequences, sgRNA sequences, primers, vectors)
