# Supplementary material for: CRISPR screens reveal genetic determinants of PARP inhibitor sensitivity and resistance in prostate cancer
Source: Springer Nature journal article supplement (doi:10.1038/s41467-023-35880-y), 2023-01-17
Supplement: MOESM4 [file 41467_2023_35880_MOESM4_ESM.xlsx]

## Sheet: All negative selection
Supplementary Data 2. Genes identified from negative selection
LNCaP					C4-2B					22Rv1					DU145
Gene	DMSO	Olaparib	diff	negative rank	Gene	DMSO	Olaparib	diff	negative rank	Gene	DMSO	Olaparib	diff	negative rank	Gene	DMSO	Olaparib	diff	negative rank
WDR76	0.0502223	-0.923615	-0.973837	1	ITPA	-0.073949	-1.27994	-1.206	1	HOXB13	-0.854268	-2.33915	-1.48489	1	EME1	0.115777	-0.984758	-1.10054	1
FANCL	-0.200076	-1.17233	-0.97225	2	FANCI	-0.209939	-1.34346	-1.13352	2	FANCM	-0.576437	-1.93905	-1.36261	2	DTX2	-0.0968233	-1.18534	-1.08852	2
SMC3	-1.16664	-2.13353	-0.966887	3	XRCC1	-0.210104	-1.32916	-1.11906	3	CDK4	-1.24076	-2.42742	-1.18666	3	BRCA2	-0.501404	-1.50882	-1.00742	3
FANCF	-0.241089	-1.19352	-0.952428	4	RAD54L	0.120951	-0.969177	-1.09013	4	CENPF	-0.408859	-1.55167	-1.14281	4	TADA2B	0.368813	-0.575748	-0.944561	4
TONSL	-0.992061	-1.94105	-0.948993	5	RIF1	-0.578537	-1.58046	-1.00192	5	TSC22D2	-0.507675	-1.6356	-1.12792	5	LIG1	0.016295	-0.829747	-0.846042	5
NAMPT	-0.0096583	-0.951545	-0.941886	6	CHD1L	-0.18303	-1.14799	-0.964965	6	WDR24	-1.15714	-2.13766	-0.980511	6	FAM120A	-0.238517	-0.985973	-0.747456	6
FANCI	-0.436996	-1.33948	-0.902479	7	WDR76	-0.0404135	-0.995862	-0.955448	7	HNRNPA2B1	-0.409604	-1.37242	-0.962816	7	EHMT1	-0.184708	-0.912043	-0.727335	7
ESPL1	-1.32096	-2.16756	-0.846598	8	HEXIM1	0.0538065	-0.893549	-0.947356	8	TRA2B	-0.64579	-1.58699	-0.941204	8	NDUFV1	-0.0735832	-0.781924	-0.70834	8
NRDE2	-0.86731	-1.7134	-0.84609	9	FANCM	-0.369909	-1.30167	-0.931759	9	DDX5	-0.408989	-1.31715	-0.908158	9	RFC1	-0.163796	-0.85598	-0.692184	9
CCNK	-0.789428	-1.62186	-0.832437	10	FANCL	-0.0994667	-1.02182	-0.922356	10	STAG2	0.375105	-0.518421	-0.893525	10	NDUFC2	-0.0698729	-0.727112	-0.657239	10
RAD54L	-0.20011	-1.02129	-0.821181	11	FBXO11	-0.636845	-1.53589	-0.899048	11	USP38	-0.290876	-1.18189	-0.891018	11	RAD54L	-0.120076	-0.747611	-0.627535	11
CHD1L	-0.335231	-1.1325	-0.797267	12	UBR2	0.23301	-0.612723	-0.845734	12	DET1	0.493054	-0.389982	-0.883036	12	NUDT21	-0.621961	-1.22694	-0.604975	12
RNASEH2A	-1.06076	-1.8571	-0.796334	13	RFWD3	0.119555	-0.712016	-0.831571	13	FTSJ3	-0.613669	-1.48729	-0.873622	13	CTNNB1	0.245074	-0.343561	-0.588635	13
RFC1	-0.494416	-1.23703	-0.742618	14	PPM1G	-0.593787	-1.41668	-0.822889	14	BTAF1	-0.986715	-1.84414	-0.857428	14	TMEM165	-0.348992	-0.933627	-0.584635	14
BCL2L1	-0.441969	-1.16838	-0.726409	15	FANCF	0.0651088	-0.72981	-0.794919	15	HUS1	-0.812582	-1.66715	-0.854566	15	NDUFA10	-0.100738	-0.683459	-0.582721	15
FANCM	-0.53283	-1.25757	-0.724742	16	MCM6	-1.09664	-1.88979	-0.793149	16	SRSF7	-0.851426	-1.70291	-0.851488	16	VPS4B	-0.133909	-0.706543	-0.572634	16
CDK12	-0.329206	-1.03927	-0.710062	17	APEX2	-0.115774	-0.899512	-0.783737	17	NDUFAF4	-0.305642	-1.15325	-0.847603	17	KIAA1109	0.430399	-0.13907	-0.569469	17
BAZ1B	-0.287249	-0.991611	-0.704362	18	ANKRD32	-0.066172	-0.847515	-0.781343	18	ATP6V1B2	-0.781007	-1.62609	-0.84508	18	RNPC3	-0.738766	-1.30584	-0.567068	18
RPRD1B	-0.0474379	-0.741807	-0.694369	19	FANCD2	0.065868	-0.71275	-0.778618	19	INTS7	-1.27011	-2.10706	-0.836951	19	NDUFA1	-0.0717692	-0.638463	-0.566694	19
HELLS	0.113978	-0.562723	-0.676701	20	FAM115A	0.347163	-0.429252	-0.776415	20	UBE2K	0.0596708	-0.767485	-0.827155	20	GTF2E2	-0.657567	-1.22008	-0.562513	20
FANCE	-0.306412	-0.970475	-0.664063	21	FANCG	-0.378526	-1.15476	-0.776235	21	POLE3	-0.275788	-1.09994	-0.824151	21	LMBRD2	0.355188	-0.19359	-0.548778	21
POLB	0.0363767	-0.620412	-0.656789	22	RARS	-0.482662	-1.24284	-0.760182	22	FEM1B	0.203557	-0.59922	-0.802777	22	UPF1	-0.883061	-1.42921	-0.546151	22
PRPF8	-0.939188	-1.57914	-0.639954	23	FBXW11	-0.3517	-1.10185	-0.750153	23	GATSL2	-0.00506182	-0.807234	-0.802172	23	MEMO1	0.184412	-0.356774	-0.541186	23
ITPA	-0.290097	-0.913447	-0.62335	24	PRPF38A	-1.02588	-1.76361	-0.737721	24	OXSR1	0.152953	-0.641603	-0.794556	24	CFH	0.443119	-0.0977391	-0.540859	24
RNASEH2B	-0.387648	-1.00785	-0.620204	25	BRD2	-0.879201	-1.61135	-0.732149	25	ENSA	-0.425133	-1.21885	-0.793716	25	ROCK1	1.08418	0.545735	-0.538445	25
RNF4	-0.380586	-1.00055	-0.619969	26	RFX7	-0.122951	-0.84789	-0.724939	26	RABGEF1	-0.308206	-1.1012	-0.792993	26	SLC25A21	0.1994	-0.330168	-0.529568	26
MIB1	0.384659	-0.234381	-0.619039	27	BRCA1	0.32678	-0.397917	-0.724697	27	FBXL5	-0.0233034	-0.81185	-0.788546	27	ECT2	-0.554108	-1.08132	-0.527211	27
WDHD1	-0.47616	-1.08936	-0.613202	28	SMC3	-1.30953	-2.02211	-0.712582	28	UBE2A	0.363399	-0.414873	-0.778272	28	TTN	0.291382	-0.231225	-0.522607	28
RFC3	-0.516308	-1.12883	-0.612524	29	MMS22L	-0.884098	-1.59237	-0.708268	29	DAXX	0.189466	-0.584659	-0.774125	29	HELLS	0.0200788	-0.500732	-0.520811	29
DDX42	-0.449514	-1.05673	-0.607216	30	MEMO1	-0.575223	-1.2826	-0.707376	30	RWDD3	-0.120403	-0.893625	-0.773222	30	RAD51AP1	-0.0435104	-0.561564	-0.518054	30
PEX10	-0.794666	-1.40034	-0.605676	31	NAPA	-0.402104	-1.10709	-0.704983	31	AMBRA1	-0.116225	-0.883936	-0.767711	31	ABHD11	-0.136617	-0.65197	-0.515354	31
UBE2M	-1.01899	-1.62305	-0.604068	32	RFC1	-0.492495	-1.19128	-0.69878	32	RBBP8	-0.488352	-1.2497	-0.76135	32	UFD1L	-0.843293	-1.35843	-0.515136	32
SIVA1	0.0843898	-0.510988	-0.595378	33	PDE4DIP	-0.31379	-1.00485	-0.691064	33	STAT5B	-0.113532	-0.873628	-0.760096	33	MND1	0.0261403	-0.488521	-0.514661	33
QARS	-1.28689	-1.8817	-0.594816	34	MCM5	-0.884723	-1.57129	-0.686563	34	SCAF8	0.0097806	-0.74537	-0.755151	34	SLC22A25	0.0750196	-0.439144	-0.514164	34
SMU1	-0.920173	-1.51492	-0.594743	35	PEX12	-0.225695	-0.905517	-0.679822	35	DTX2	-0.127435	-0.879631	-0.752197	35	AP4S1	0.084336	-0.425929	-0.510265	35
RPRD2	-0.267029	-0.857485	-0.590456	36	SPIDR	-0.10209	-0.77186	-0.66977	36	AKAP1	-0.123267	-0.873873	-0.750605	36	NRF1	-0.331796	-0.841983	-0.510187	36
ANLN	-0.341328	-0.924603	-0.583275	37	SWI5	0.0748159	-0.593233	-0.668049	37	CUL2	-0.726866	-1.47309	-0.746227	37	RFWD2	0.0674481	-0.442529	-0.509977	37
POLA1	-0.78847	-1.3716	-0.583134	38	ZC3H7A	0.124899	-0.540991	-0.66589	38	REV3L	-0.762995	-1.50733	-0.744331	38	CLOCK	0.3364	-0.170936	-0.507336	38
WAC	-0.487477	-1.0701	-0.582625	39	MNT	-0.222875	-0.887688	-0.664813	39	PRUNE	-0.392952	-1.12803	-0.735081	39	EIF5A2	0.378733	-0.121625	-0.500358	39
UNC45A	-0.156957	-0.737455	-0.580498	40	HELLS	0.192941	-0.470495	-0.663436	40	TRMT6	-0.599105	-1.32856	-0.72945	40	CCDC101	-0.349265	-0.844537	-0.495272	40
SMARCAL1	0.166538	-0.406932	-0.57347	41	SRRM1	-0.0991123	-0.762066	-0.662953	41	FANCE	-0.657745	-1.38703	-0.729281	41	WDR76	-0.21387	-0.708352	-0.494482	41
GIGYF2	0.0364602	-0.529759	-0.566219	42	SSU72	-1.39708	-2.04855	-0.651467	42	RAD51	-1.18012	-1.90571	-0.725583	42	PDCL2	0.185689	-0.306084	-0.491773	42
FOXA1	-0.82697	-1.39133	-0.564365	43	STRA13	-0.445675	-1.09609	-0.650413	43	LZTR1	0.204708	-0.520306	-0.725014	43	SCFD1	-0.17855	-0.670207	-0.491656	43
NCBP1	-0.287971	-0.849084	-0.561113	44	PNN	-0.320897	-0.96811	-0.647213	44	NCOR1	-0.113588	-0.838509	-0.724921	44	OAS2	-0.147423	-0.638443	-0.491021	44
PLRG1	-0.433743	-0.992399	-0.558656	45	ABCC4	0.35932	-0.286857	-0.646178	45	RNASEH2B	-0.404415	-1.12863	-0.724217	45	NDUFB4	0.385212	-0.105381	-0.490593	45
PPM1G	-0.501993	-1.06064	-0.558647	46	CRNKL1	-0.660589	-1.30002	-0.639436	46	MYH9	0.290607	-0.428922	-0.719529	46	SLC35F4	0.212898	-0.276845	-0.489743	46
KIF14	-0.44891	-1.00547	-0.556561	47	DKC1	0.0771459	-0.562051	-0.639197	47	MRPS25	-0.34101	-1.05597	-0.714955	47	ZSWIM7	0.209685	-0.279223	-0.488908	47
RQCD1	-0.14182	-0.695542	-0.553723	48	INTS1	-1.14131	-1.77659	-0.635278	48	SEC31A	-0.203362	-0.918097	-0.714735	48	MUS81	-0.17021	-0.655937	-0.485727	48
CREB1	0.167943	-0.384859	-0.552802	49	CS	-0.13893	-0.77162	-0.63269	49	CIC	-0.0946644	-0.807238	-0.712573	49	SMNDC1	-0.817555	-1.30137	-0.483812	49
EME1	-0.119621	-0.670426	-0.550805	50	ANAPC1	-0.220222	-0.847103	-0.626881	50	USP15	-0.168484	-0.878025	-0.70954	50	PHF12	-0.293178	-0.77513	-0.481952	50
EGLN1	0.117908	-0.427042	-0.544949	51	THOC2	-0.495531	-1.11149	-0.615963	51	SETD5	-0.183437	-0.892003	-0.708566	51	NDUFB11	-0.0235695	-0.505204	-0.481634	51
DDX3Y	0.327936	-0.216299	-0.544235	52	SRSF9	0.185268	-0.415085	-0.600353	52	STUB1	-0.560059	-1.26842	-0.708363	52	TOPBP1	-0.893034	-1.37455	-0.481513	52
MCM9	0.148925	-0.394808	-0.543733	53	GATAD2A	-0.131235	-0.722736	-0.591501	53	ZNF461	0.354788	-0.344853	-0.699641	53	PPAP2A	0.455759	-0.0253998	-0.481159	53
ATM	0.143133	-0.398962	-0.542094	54	WDR26	-0.700685	-1.2904	-0.589715	54	WDR76	0.0530569	-0.646103	-0.69916	54	TMEM95	0.067319	-0.413719	-0.481038	54
KPTN	0.255841	-0.282063	-0.537904	55	ZNF629	0.0688549	-0.51956	-0.588415	55	COL4A6	0.0379173	-0.660338	-0.698255	55	CCDC112	0.653777	0.173214	-0.480563	55
CHMP4A	-0.116476	-0.65297	-0.536494	56	SRP54	-0.46856	-1.05674	-0.58818	56	HIST2H3A	-1.19258	-1.8854	-0.692826	56	NDUFB10	-0.422453	-0.902931	-0.480479	56
DTYMK	-1.02302	-1.55699	-0.533972	57	MUS81	-0.0975916	-0.684371	-0.586779	57	UPK3BL	-0.575551	-1.26728	-0.69173	57	KIAA0196	-0.206936	-0.68622	-0.479284	57
FANCG	-0.68976	-1.22186	-0.532098	58	PPP4C	-0.900074	-1.4861	-0.58603	58	PRPF3	-0.368498	-1.06006	-0.691559	58	DNAJC17	-0.272678	-0.751657	-0.478979	58
PSMB1	-1.08707	-1.61908	-0.53201	59	RNF146	0.409244	-0.169919	-0.579164	59	TRIB1	0.117587	-0.571955	-0.689541	59	KIAA1524	-0.533109	-1.0093	-0.476191	59
NAGLU	0.0104302	-0.518692	-0.529122	60	DNAJC9	-0.588609	-1.16568	-0.577075	60	RBMY1D	-0.0182228	-0.706755	-0.688532	60	MCM4	-0.829458	-1.30426	-0.474802	60
ROCK1	-0.0922154	-0.621149	-0.528934	61	ZMYM4	-0.451849	-1.02817	-0.57632	61	NPIPA3	-0.821443	-1.50757	-0.686129	61	YPEL5	-0.500728	-0.973016	-0.472288	61
PTPN13	0.183112	-0.341883	-0.524994	62	FANCE	-0.270723	-0.846562	-0.575839	62	POLE	-0.69096	-1.37553	-0.684565	62	GOLGA8O	0.27488	-0.196727	-0.471608	62
RAD51B	-0.106789	-0.630757	-0.523967	63	CDK10	0.194656	-0.380856	-0.575512	63	ATP8B2	-0.222426	-0.906952	-0.684525	63	EIF2B1	-0.820765	-1.29188	-0.471119	63
MCM3AP	-0.678281	-1.20012	-0.521838	64	PURA	0.0765695	-0.497335	-0.573904	64	SUPT16H	-0.590523	-1.27078	-0.68026	64	SYCP1	0.159581	-0.309125	-0.468706	64
KIF15	-0.259013	-0.780669	-0.521656	65	UBA1	-1.65608	-2.22777	-0.571689	65	SPRED2	0.0466884	-0.632927	-0.679615	65	CTNNA1	0.678855	0.21048	-0.468376	65
DSCC1	-0.517314	-1.03557	-0.518256	66	FANCB	0.139309	-0.431174	-0.570483	66	FAM193A	0.169371	-0.508026	-0.677397	66	OR51S1	0.222682	-0.245543	-0.468225	66
IQGAP3	-0.305879	-0.821741	-0.515862	67	CWC27	-0.0850557	-0.649062	-0.564006	67	WDR70	-0.41965	-1.09644	-0.676786	67	SRSF10	0.129786	-0.337426	-0.467212	67
GEN1	0.18067	-0.334748	-0.515418	68	LIG1	-0.320305	-0.883854	-0.563549	68	GRN	-0.205586	-0.878944	-0.673358	68	SLC20A1	-0.14603	-0.610713	-0.464683	68
PRPF31	-0.912137	-1.42069	-0.508554	69	USP37	-0.472553	-1.03555	-0.562995	69	MNDA	0.192952	-0.47985	-0.672801	69	OTUB1	-0.149015	-0.612088	-0.463073	69
CDK10	0.0506614	-0.457563	-0.508224	70	ASB4	0.571904	0.00984371	-0.56206	70	CLLU1OS	0.459106	-0.212971	-0.672078	70	GPR18	0.477884	0.0172845	-0.460599	70
DNA2	-0.99618	-1.50298	-0.506796	71	ATMIN	0.279833	-0.282117	-0.56195	71	EZH1	0.00124762	-0.669135	-0.670383	71	AGA	0.411578	-0.0483253	-0.459903	71
DTL	-0.528813	-1.03334	-0.504532	72	CPEB4	-0.289561	-0.851254	-0.561693	72	NPEPPS	0.235828	-0.432852	-0.66868	72	ATG9A	-0.00987134	-0.46956	-0.459688	72
ZCCHC6	0.176405	-0.324741	-0.501146	73	GTF3C4	-0.914457	-1.47284	-0.558382	73	TBL1XR1	-0.268665	-0.937342	-0.668677	73	ZNF639	0.200552	-0.258835	-0.459387	73
ZNF782	-0.396188	-0.896172	-0.499984	74	YPEL5	-1.23612	-1.79417	-0.558052	74	FKBP9	0.0684494	-0.59993	-0.66838	74	ATF2	0.243397	-0.21454	-0.457938	74
HNRNPL	-1.21601	-1.71394	-0.497927	75	CHAMP1	-0.200942	-0.756172	-0.55523	75	MEF2C	0.211703	-0.456602	-0.668304	75	NDUFAF1	-0.0943327	-0.549087	-0.454754	75
CFAP44	0.0124899	-0.480899	-0.493389	76	POLR1C	-0.700271	-1.25467	-0.5544	76	PHLDA2	-0.0592154	-0.727015	-0.6678	76	TANGO6	-0.818905	-1.27109	-0.452183	76
MDC1	-0.433801	-0.926959	-0.493158	77	ABHD16A	0.352499	-0.201854	-0.554353	77	UROD	-0.638008	-1.30194	-0.663931	77	TMEM126B	0.270361	-0.181369	-0.45173	77
PDIA4	0.000264815	-0.492779	-0.493044	78	CCS	0.0525382	-0.499256	-0.551794	78	RHBDD2	0.199251	-0.463706	-0.662957	78	INTS2	-0.478565	-0.929717	-0.451151	78
WRN	0.120916	-0.370778	-0.491694	79	GATA2	-1.27109	-1.82156	-0.550468	79	C2CD5	-0.0805345	-0.742994	-0.662459	79	RPA1	-0.946873	-1.39524	-0.448366	79
HIAT1	-0.211273	-0.702648	-0.491375	80	POLB	0.0696838	-0.479844	-0.549528	80	PDE3B	-0.00396225	-0.666207	-0.662245	80	MAD2L1	-0.204318	-0.650049	-0.445731	80
SMC5	-0.537494	-1.02658	-0.489084	81	TRAPPC13	-0.19669	-0.745547	-0.548857	81	POLG2	-1.35572	-2.01483	-0.659102	81	SNX6	-0.167074	-0.61258	-0.445505	81
ESCO1	0.215247	-0.273349	-0.488596	82	UBE2T	0.0700357	-0.475083	-0.545119	82	ZNF343	0.211413	-0.44678	-0.658192	82	CES1	0.214136	-0.230967	-0.445103	82
CCDC88A	0.441577	-0.0466637	-0.48824	83	RAD51B	-0.0779626	-0.622964	-0.545001	83	RFWD2	-0.271416	-0.92895	-0.657534	83	UBN2	0.0244218	-0.420619	-0.44504	83
MAPK8IP3	0.0755917	-0.411078	-0.48667	84	SLX4	-0.0471176	-0.591546	-0.544428	84	PSMB4	-1.04216	-1.69946	-0.657307	84	MACF1	0.220579	-0.224433	-0.445012	84
MCM4	-0.990097	-1.47588	-0.485786	85	PEX26	-0.219798	-0.759259	-0.539462	85	PPM1G	-1.00385	-1.66017	-0.656317	85	TRAIP	-0.992089	-1.43647	-0.444385	85
MUS81	-0.368299	-0.852311	-0.484012	86	PDCD6	0.0750026	-0.463576	-0.538578	86	LYG2	0.0312438	-0.624984	-0.656228	86	LEMD3	0.293907	-0.148131	-0.442038	86
DIS3L2	-0.209089	-0.692519	-0.48343	87	TONSL	-1.23494	-1.77302	-0.538076	87	TRMT5	-0.584705	-1.24066	-0.655959	87	SUPT20H	0.0796237	-0.362397	-0.442021	87
NRIP2	0.0347917	-0.447827	-0.482619	88	KIAA0195	0.184119	-0.350287	-0.534406	88	SLC2A1	-0.826927	-1.48288	-0.655949	88	EGLN3	0.00217569	-0.439134	-0.44131	88
ZNF479	-0.0116661	-0.490956	-0.47929	89	IL1RAPL2	0.194914	-0.338345	-0.533259	89	COPS2	-0.668362	-1.32403	-0.655668	89	ESCO2	0.0940044	-0.345972	-0.439976	89
SRL	0.00353517	-0.474872	-0.478407	90	POLQ	-0.676042	-1.2091	-0.533056	90	SPTLC2	-0.341469	-0.996505	-0.655036	90	RAD21	-0.542144	-0.979951	-0.437807	90
OPTN	-0.0605218	-0.538395	-0.477874	91	DCAF8	0.599666	0.0681467	-0.531519	91	SLC25A11	-0.256183	-0.910404	-0.654221	91	XRCC1	-0.543871	-0.981525	-0.437654	91
THAP11	0.131765	-0.345924	-0.47769	92	PHF2	0.206542	-0.323994	-0.530536	92	TIMELESS	-0.228048	-0.881712	-0.653663	92	TRAPPC11	-0.565657	-0.999844	-0.434188	92
DDX11	-0.152599	-0.629974	-0.477375	93	POMP	0.0567453	-0.472731	-0.529476	93	NDUFA2	-0.575026	-1.22802	-0.65299	93	MAFK	-0.205621	-0.637972	-0.432351	93
KLHDC3	-0.0937173	-0.568455	-0.474738	94	ESCO2	0.315281	-0.213804	-0.529085	94	CAPRIN1	-0.141943	-0.793172	-0.651229	94	SBNO1	-0.52239	-0.954675	-0.432285	94
SWSAP1	0.0451299	-0.42855	-0.47368	95	POLH	0.452221	-0.0768452	-0.529066	95	COX15	-0.521525	-1.17145	-0.649928	95	EMC3	0.0853042	-0.344638	-0.429942	95
SAP18	-0.77736	-1.24872	-0.471359	96	HNRNPA2B1	-0.659298	-1.18498	-0.525686	96	ANKRD32	-0.0290809	-0.675899	-0.646818	96	ITGA3	-0.268556	-0.698102	-0.429547	96
POLR1A	-0.774981	-1.24591	-0.470924	97	PAQR3	0.513581	-0.0114956	-0.525077	97	SLC25A28	-0.316012	-0.962555	-0.646543	97	CYR61	0.0846211	-0.344142	-0.428763	97
AP1G2	-0.238886	-0.709307	-0.470421	98	TDP1	-0.007402	-0.531062	-0.52366	98	VPS33A	-0.630049	-1.27382	-0.64377	98	PRRC2C	0.067734	-0.36097	-0.428704	98
IGSF1	0.360193	-0.109564	-0.469757	99	NAA25	-0.642156	-1.16557	-0.523413	99	ANKRD35	-0.0760654	-0.718909	-0.642844	99	WDR3	-1.11776	-1.54222	-0.424454	99
UBE2N	-0.496697	-0.966232	-0.469535	100	B3GALT2	0.516337	-0.0064638	-0.522801	100	MCL1	-0.797816	-1.44053	-0.642716	100	FKBP15	0.324154	-0.0998021	-0.423956	100
XRCC1	-0.830286	-1.29858	-0.468296	101	ARRDC3	0.592473	0.0699013	-0.522572	101	AURKA	-0.571674	-1.21426	-0.642589	101	DET1	-0.0346838	-0.456442	-0.421758	101
HMMR	-0.011979	-0.478154	-0.466175	102	NCMAP	0.101064	-0.420823	-0.521886	102	SLC40A1	0.264811	-0.376385	-0.641196	102	TMA16	0.1114	-0.309345	-0.420745	102
LIN37	0.00103347	-0.465043	-0.466076	103	POLR2J2	-0.734954	-1.25662	-0.521661	103	FBL	-0.562996	-1.20121	-0.638212	103	ZNF462	0.283649	-0.136791	-0.42044	103
TNNC1	0.0663308	-0.398507	-0.464838	104	USP34	0.391714	-0.12821	-0.519925	104	EPC2	0.106285	-0.531158	-0.637443	104	PSIP1	0.446351	0.0261685	-0.420183	104
ING3	-0.291232	-0.755944	-0.464712	105	SMARCAL1	0.572166	0.0557677	-0.516399	105	MOSPD3	-0.103302	-0.740733	-0.63743	105	SETD5	-0.0163513	-0.436485	-0.420133	105
STUB1	0.199022	-0.265015	-0.464037	106	NBPF7	-0.243923	-0.759171	-0.515248	106	SRD5A3	0.119782	-0.516236	-0.636018	106	GCHFR	0.291257	-0.126648	-0.417905	106
MCM6	-0.974187	-1.43769	-0.4635	107	NRF1	-0.830135	-1.34533	-0.515196	107	MRPS15	-0.123409	-0.756849	-0.633439	107	METTL6	0.140635	-0.277042	-0.417677	107
GTF2A2	0.121142	-0.34204	-0.463182	108	STYXL1	0.0646048	-0.449217	-0.513822	108	NUP210L	0.395993	-0.236459	-0.632452	108	MRPL44	-0.667341	-1.08244	-0.415095	108
USP8	-0.460971	-0.922571	-0.461599	109	DUSP27	0.330367	-0.182764	-0.513131	109	EMR2	0.130136	-0.50151	-0.631646	109	CFAP44	0.268104	-0.146438	-0.414542	109
RFXAP	-0.185271	-0.646496	-0.461225	110	PRPF18	-0.258478	-0.765557	-0.507079	110	RACGAP1	-0.575253	-1.20651	-0.63126	110	FBXL3	0.408906	-0.00557758	-0.414484	110
SNAPC3	-0.484348	-0.943359	-0.45901	111	SCGN	0.160928	-0.345937	-0.506865	111	BYSL	-0.990953	-1.62044	-0.629483	111	BRWD3	0.248015	-0.165659	-0.413675	111
PSPH	-0.0117666	-0.469857	-0.458091	112	PRMT7	-0.470833	-0.97766	-0.506827	112	RPL35A	-0.538985	-1.16761	-0.62863	112	PARD6A	-0.0510611	-0.461954	-0.410893	112
SPINK5	-0.169457	-0.626538	-0.45708	113	DUSP12	-0.0466705	-0.552306	-0.505636	113	CNBP	0.173633	-0.452122	-0.625755	113	RNGTT	-1.21494	-1.62362	-0.408675	113
PRPF3	-0.610751	-1.06777	-0.457017	114	ARIH2	0.376656	-0.128616	-0.505272	114	RGAG1	0.275009	-0.349993	-0.625003	114	TRIP4	0.306134	-0.102356	-0.408489	114
MMS22L	-1.20437	-1.6613	-0.456937	115	ATG12	-0.0161746	-0.519704	-0.50353	115	ELF4	0.294802	-0.329002	-0.623804	115	SPAG17	0.286898	-0.121414	-0.408311	115
SLC25A37	-0.0552338	-0.510924	-0.45569	116	MCM4	-0.515672	-1.01756	-0.501885	116	INCENP	-0.825119	-1.44852	-0.623402	116	DDX11	-0.64369	-1.05012	-0.406431	116
KRT80	-0.00900693	-0.463991	-0.454984	117	HHLA2	0.796195	0.295054	-0.50114	117	INTS1	-1.18706	-1.80997	-0.622911	117	LEO1	0.184429	-0.221683	-0.406112	117
ZMYM4	0.164135	-0.290711	-0.454846	118	AGTRAP	0.0377298	-0.463317	-0.501046	118	DDX21	-0.307666	-0.929724	-0.622058	118	IWS1	0.38033	-0.0256789	-0.406009	118
ASTE1	0.0111113	-0.442706	-0.453818	119	MXD4	0.0703464	-0.43062	-0.500966	119	RNASEH2C	-1.14425	-1.76468	-0.620425	119	GOLGA6D	-0.109858	-0.515412	-0.405554	119
VTI1B	0.126001	-0.327791	-0.453793	120	STAG2	0.0261274	-0.472335	-0.498462	120	ZFX	0.10957	-0.510483	-0.620053	120	CYC1	-0.970027	-1.37544	-0.405417	120
RAD18	-0.0701106	-0.52362	-0.453509	121	SLC39A5	0.22071	-0.277707	-0.498417	121	ZDHHC2	0.149792	-0.46939	-0.619182	121	XPO1	-1.43232	-1.83767	-0.405352	121
BTG3	0.239915	-0.213556	-0.453471	122	NDNL2	-1.38092	-1.87744	-0.496519	122	CRLS1	-0.444124	-1.05741	-0.613287	122	TAF5L	-0.0302515	-0.435127	-0.404875	122
FANCA	-0.331132	-0.784537	-0.453405	123	GABRA2	0.567979	0.0715334	-0.496445	123	GFM2	-0.352256	-0.965195	-0.612939	123	TIMMDC1	0.000680785	-0.404078	-0.404759	123
PPP2R5C	0.229285	-0.224108	-0.453392	124	PLXNA4	0.171561	-0.324085	-0.495645	124	HELLS	-0.106425	-0.719308	-0.612883	124	MAP2K7	-0.535462	-0.939424	-0.403962	124
ASUN	-0.462435	-0.914543	-0.452107	125	SRRT	-1.22196	-1.71671	-0.494749	125	LSM14A	-0.0588603	-0.671709	-0.612849	125	SPIN3	0.295373	-0.108053	-0.403426	125
TCF3	0.193761	-0.256687	-0.450448	126	LARP7	-0.0499661	-0.544014	-0.494048	126	MSH4	0.387097	-0.221601	-0.608698	126	CFAP45	-0.0623177	-0.465448	-0.40313	126
KYNU	0.530352	0.080284	-0.450068	127	RNASEH2A	-1.02436	-1.51761	-0.493251	127	TSR3	0.0289611	-0.579642	-0.608603	127	LPHN2	0.220946	-0.181973	-0.402918	127
PIK3C2B	-0.0777775	-0.527719	-0.449942	128	KIAA1919	-0.0209521	-0.512338	-0.491386	128	LYSMD3	0.561883	-0.0464701	-0.608353	128	NADSYN1	0.0707117	-0.33217	-0.402882	128
SNF8	-0.803062	-1.24938	-0.446316	129	HEXIM2	0.135071	-0.356188	-0.491259	129	MTX1	-0.412889	-1.02036	-0.607469	129	HEMGN	0.273359	-0.12915	-0.402508	129
RWDD3	0.0755609	-0.37073	-0.446291	130	ZNF528	0.140673	-0.350253	-0.490926	130	NEMF	0.224526	-0.381904	-0.60643	130	MOBP	0.333321	-0.0688255	-0.402147	130
HDAC3	-0.608487	-1.0539	-0.445414	131	EIF4B	-0.15577	-0.645472	-0.489702	131	CTNNB1	0.319463	-0.286535	-0.605999	131	OR2A2	0.288991	-0.112514	-0.401505	131
QRICH1	-0.213352	-0.656336	-0.442985	132	OVGP1	0.216328	-0.271915	-0.488244	132	SLC12A8	-0.252282	-0.857767	-0.605485	132	SLC7A11	0.177302	-0.224025	-0.401326	132
ZNF589	-0.0833825	-0.525524	-0.442141	133	STAG1	-0.291283	-0.779327	-0.488044	133	FCN2	0.24618	-0.358428	-0.604607	133	BSCL2	0.124895	-0.274766	-0.399661	133
NCOR2	0.0517342	-0.389864	-0.441598	134	OSBPL11	0.0423225	-0.445237	-0.48756	134	ZNF687	-0.502538	-1.10502	-0.602486	134	TAF6L	-0.283426	-0.682438	-0.399012	134
RNF168	-0.311461	-0.752518	-0.441057	135	TECRL	0.477024	-0.00973932	-0.486763	135	CNOT3	-0.677918	-1.28037	-0.602456	135	PSMA2	-0.550962	-0.949098	-0.398136	135
NBPF10	-0.725761	-1.16497	-0.43921	136	NTNG1	-0.00246376	-0.488812	-0.486348	136	TNNT2	-0.25579	-0.856451	-0.600661	136	PSENEN	-0.305358	-0.703346	-0.397988	136
THOC1	0.214363	-0.22371	-0.438072	137	ZBTB1	-0.0140584	-0.500093	-0.486034	137	TTC24	-0.389376	-0.990025	-0.600649	137	GTF2I	0.184793	-0.213172	-0.397965	137
PRIM2	-0.66948	-1.10732	-0.437842	138	NONO	0.234091	-0.250365	-0.484457	138	SRRM1	-0.677822	-1.27774	-0.599917	138	HECTD1	-0.840127	-1.23664	-0.396514	138
CLCN6	0.173979	-0.263672	-0.437651	139	ACLY	-0.60031	-1.08404	-0.483726	139	EIF2B3	-0.524976	-1.12275	-0.597775	139	CS	0.092453	-0.303944	-0.396397	139
CSNK2B	-1.08787	-1.52464	-0.436773	140	ANP32B	-0.0630185	-0.546497	-0.483478	140	KRTAP5-3	0.0941339	-0.503215	-0.597349	140	LDHAL6B	0.252121	-0.144086	-0.396207	140
RBMXL1	-0.119253	-0.552982	-0.433729	141	MTF2	-0.258464	-0.741682	-0.483218	141	ARMC9	0.235335	-0.360522	-0.595857	141	POLDIP2	-0.0227976	-0.418504	-0.395707	141
ALG11	-0.551927	-0.985275	-0.433348	142	PRPF4B	0.0167563	-0.466335	-0.483091	142	LAMTOR2	-0.70256	-1.29839	-0.595827	142	SLC22A24	0.0783531	-0.315914	-0.394267	142
NAA50	-0.458375	-0.891218	-0.432843	143	ZRANB1	-0.286025	-0.768146	-0.482121	143	KIAA1324	-0.346597	-0.941293	-0.594696	143	INADL	0.273067	-0.12091	-0.393978	143
RAB2A	0.237959	-0.194158	-0.432117	144	IDE	0.230525	-0.251393	-0.481917	144	GOLGA2	0.179217	-0.415381	-0.594597	144	NPRL2	0.225343	-0.164805	-0.390147	144
ZNF721	0.186404	-0.245681	-0.432085	145	KIAA0368	0.0622783	-0.419545	-0.481824	145	KLLN	0.289906	-0.304373	-0.594279	145	RNF8	-0.383405	-0.772979	-0.389574	145
DET1	-0.269593	-0.700755	-0.431161	146	SCN2A	-0.0259586	-0.507237	-0.481278	146	OVCA2	0.0715718	-0.5187	-0.590272	146	CSNK2B	-0.905683	-1.29505	-0.389371	146
DDX24	-0.381336	-0.810987	-0.429651	147	UBQLN4	0.200039	-0.281105	-0.481144	147	WNK1	-0.660708	-1.25073	-0.590026	147	LILRA4	0.278253	-0.110815	-0.389068	147
HELZ	-0.078783	-0.508411	-0.429628	148	CCDC181	0.24966	-0.229145	-0.478805	148	RGS17	0.115396	-0.473606	-0.589002	148	CBLL1	0.173064	-0.215364	-0.388427	148
PNMA3	0.21248	-0.215681	-0.42816	149	AIF1	0.165306	-0.313369	-0.478675	149	NFKBIA	0.336094	-0.252865	-0.58896	149	ATP5B	-0.351379	-0.738685	-0.387305	149
DAP3	-0.901263	-1.32829	-0.427027	150	OR2Z1	0.23045	-0.247512	-0.477962	150	FAM71B	0.0579518	-0.530177	-0.588129	150	AHCTF1	-0.542354	-0.929475	-0.387121	150
NR2C2	-0.30755	-0.73423	-0.42668	151	RPL7	-0.892111	-1.36981	-0.477701	151	TSR2	-0.712546	-1.30063	-0.588088	151	FAM111A	0.417868	0.0315914	-0.386277	151
TOX4	-0.325932	-0.752564	-0.426632	152	PRIMPOL	0.542822	0.0652275	-0.477595	152	PRDX2	-0.484016	-1.06966	-0.585647	152	SUCLG2	0.0996394	-0.2863	-0.385939	152
LCMT1	0.0450361	-0.380614	-0.42565	153	ZNF133	-0.0187871	-0.495659	-0.476872	153	GPRC5A	0.179686	-0.405323	-0.585009	153	UNC119	-0.078557	-0.464246	-0.385689	153
DMGDH	0.295469	-0.127779	-0.423248	154	RBM28	-0.514762	-0.991404	-0.476642	154						TMCC1	0.192071	-0.192701	-0.384772	154
CDK8	0.301681	-0.120942	-0.422622	155	RAD1	-0.298285	-0.774564	-0.476279	155						ZBTB41	0.166645	-0.217274	-0.383918	155
RBM11	0.0112479	-0.41124	-0.422488	156	LRRC71	0.140231	-0.334166	-0.474397	156						TCEAL4	0.265494	-0.117649	-0.383144	156
GSTM5	0.176984	-0.245045	-0.422029	157	NAMPT	-0.636469	-1.11026	-0.473788	157						TMX1	-0.0183122	-0.400686	-0.382374	157
DENR	-0.707432	-1.128	-0.420569	158	NSD1	-0.7635	-1.23487	-0.471366	158						AHR	0.347411	-0.0342132	-0.381624	158
DHRS7B	-0.294537	-0.714711	-0.420174	159	HPGDS	0.417001	-0.0526999	-0.469701	159						ASGR1	0.00510761	-0.376294	-0.381402	159
NIPBL	-0.376579	-0.795884	-0.419305	160	HTR3D	0.0181175	-0.451523	-0.469641	160						CLDN1	0.386557	0.00519571	-0.381362	160
NMI	0.453946	0.0346999	-0.419246	161	EXOSC9	-0.147815	-0.616876	-0.469061	161						ZNF561	0.072248	-0.308714	-0.380962	161
DENND4B	-0.0784576	-0.497589	-0.419131	162	ARMC5	-0.078471	-0.546699	-0.468228	162						ZNF490	0.329224	-0.0507883	-0.380012	162
FASTKD5	-0.239088	-0.657275	-0.418187	163	PARK7	0.169653	-0.298543	-0.468196	163						MED31	-0.100703	-0.480394	-0.379691	163
AK6	-0.471985	-0.889993	-0.418009	164	F5	0.303666	-0.164501	-0.468167	164						ZNF593	0.113012	-0.265419	-0.378431	164
SVOP	-0.409757	-0.827222	-0.417465	165	ANKRA2	0.149119	-0.318757	-0.467876	165						NAMPT	0.0723122	-0.30515	-0.377463	165
NUDCD2	-0.543746	-0.96028	-0.416534	166	KYNU	0.530638	0.0630477	-0.46759	166						RBM43	0.190062	-0.187055	-0.377117	166
ZNF251	-0.118751	-0.534842	-0.416091	167	POLE4	-0.403466	-0.869817	-0.466351	167						FBXO22	0.0695743	-0.307217	-0.376792	167
CTSK	0.162878	-0.252692	-0.41557	168	RBM22	-1.03365	-1.49937	-0.465721	168						WARS	-0.761733	-1.13707	-0.375335	168
SLX4	-0.363895	-0.778188	-0.414293	169	CDK12	-0.368342	-0.834045	-0.465702	169						PAK1IP1	-0.555844	-0.930083	-0.374239	169
POLR2B	-1.03405	-1.44834	-0.414292	170	FAM96B	-0.7578	-1.22325	-0.465454	170						FZR1	-0.30135	-0.673247	-0.371897	170
GAPVD1	0.147954	-0.26528	-0.413234	171	SPDYE6	-0.0792886	-0.544671	-0.465382	171						ELMO3	0.0988469	-0.273	-0.371847	171
UBE2K	0.0181649	-0.394519	-0.412684	172	FIP1L1	-0.758518	-1.22219	-0.463672	172						TDRD10	0.0172068	-0.353898	-0.371105	172
POLI	0.45006	0.0380067	-0.412053	173	PCGF3	0.00452937	-0.458295	-0.462825	173						FOXE1	0.208808	-0.161869	-0.370677	173
TTC21A	-0.00412559	-0.415724	-0.411598	174	RAB1A	0.326309	-0.135684	-0.461993	174						ZNF879	0.294815	-0.0756716	-0.370486	174
SRRT	-1.04731	-1.45856	-0.411246	175	NBPF1	-0.137526	-0.598755	-0.461229	175						PLK2	0.299529	-0.070688	-0.370217	175
LAPTM4A	0.287335	-0.123908	-0.411243	176	KATNAL2	0.525166	0.0642087	-0.460957	176						ZNF333	0.0249951	-0.344649	-0.369645	176
TAF5	-0.748129	-1.15803	-0.409903	177	OXCT1	0.119855	-0.341024	-0.460878	177						PAM16	-0.676487	-1.04374	-0.367248	177
FEN1	-0.820187	-1.22857	-0.408381	178	DCP1B	0.311107	-0.149585	-0.460692	178						VPS54	-0.149213	-0.516246	-0.367033	178
CYP27C1	0.096355	-0.311823	-0.408178	179	DZIP3	0.492115	0.0320429	-0.460072	179						SPINT1	-0.146301	-0.511325	-0.365025	179
VHLL	0.0400789	-0.367182	-0.407261	180	LYRM1	0.442202	-0.016955	-0.459157	180						PROCA1	-0.0651609	-0.430115	-0.364954	180
MDM1	0.148757	-0.258282	-0.40704	181	CTDNEP1	-0.235527	-0.69434	-0.458813	181						SBF2	0.192041	-0.172321	-0.364362	181
ATP6V1C1	-0.311373	-0.718072	-0.406698	182	TRERF1	0.0428427	-0.415603	-0.458446	182						FGD6	0.529796	0.165549	-0.364247	182
LIN9	-0.277898	-0.684396	-0.406498	183	CDT1	-0.530434	-0.988012	-0.457577	183						NLRP12	0.273827	-0.0900934	-0.363921	183
ZNF57	-0.0541547	-0.460472	-0.406317	184	PSMC3IP	0.286217	-0.169588	-0.455805	184						SUCLG1	-0.12269	-0.486487	-0.363797	184
NAA25	-1.17488	-1.58008	-0.405194	185	MCM3	-0.656353	-1.11191	-0.455562	185						ANKRD32	-0.0333724	-0.396549	-0.363177	185
NFXL1	0.153223	-0.251968	-0.405191	186	RIBC1	0.346594	-0.105984	-0.452578	186						TAX1BP1	-0.237974	-0.600919	-0.362944	186
JMJD4	0.0135974	-0.390402	-0.403999	187	ANAPC10	-0.433247	-0.885043	-0.451796	187						SERPINI2	0.302702	-0.0598341	-0.362536	187
RFC5	-1.0628	-1.4661	-0.403302	188	CALR3	0.0879329	-0.363397	-0.45133	188						GMPPB	-1.34112	-1.70358	-0.362457	188
CHD7	0.390919	-0.012087	-0.403006	189	NARS	-1.17872	-1.62906	-0.450341	189						CCDC96	0.288288	-0.073442	-0.36173	189
PCIF1	-0.438183	-0.841097	-0.402914	190	WSB2	-0.407822	-0.856876	-0.449054	190						SFR1	0.138735	-0.221903	-0.360638	190
ATP6V1H	-0.547137	-0.94968	-0.402543	191	FIS1	0.372623	-0.0760373	-0.44866	191						TMPRSS15	0.448472	0.0880724	-0.3604	191
ADCY10	0.0854369	-0.316936	-0.402373	192	SPATA31A5	0.104694	-0.342892	-0.447587	192						ERBB2IP	0.16558	-0.193952	-0.359532	192
ZSWIM7	-0.00971212	-0.411672	-0.40196	193	SH3D19	0.34418	-0.103356	-0.447536	193						PCYT2	0.172265	-0.186935	-0.359201	193
GNL3	-0.67452	-1.07598	-0.401458	194	SMCO2	0.141446	-0.305469	-0.446914	194						ZNF385D	0.205922	-0.152115	-0.358037	194
ARHGAP26	0.1427	-0.258307	-0.401007	195	ZFHX3	-0.118719	-0.565352	-0.446633	195						PSMB3	-1.00144	-1.35901	-0.357566	195
MYO3B	0.170377	-0.229627	-0.400003	196	IGBP1	-0.863792	-1.30975	-0.445956	196						NPEPPS	-0.560341	-0.916822	-0.35648	196
GSPT1	-0.910412	-1.31037	-0.399956	197	DCTD	0.460246	0.0144326	-0.445813	197						UBE2H	-0.281709	-0.637948	-0.356239	197
SGK223	0.204093	-0.195737	-0.39983	198	TRAPPC8	-0.446779	-0.890936	-0.444158	198						RBM45	0.372255	0.0167454	-0.35551	198
ARHGAP17	0.040926	-0.35859	-0.399516	199	HTR3C	-0.0959545	-0.539907	-0.443953	199						STYX	0.0144498	-0.340705	-0.355154	199
LIG1	-0.609413	-1.00803	-0.398614	200	CDCA2	0.395807	-0.0468051	-0.442612	200						UBE2Q1	0.104207	-0.250721	-0.354928	200
CLDN6	-0.0767973	-0.475113	-0.398316	201	L3MBTL4	0.220894	-0.220277	-0.441171	201						NCKAP1	-0.0454714	-0.400338	-0.354866	201
MEX3A	-0.155821	-0.553934	-0.398113	202	WAPAL	-0.640957	-1.08132	-0.440358	202						MBNL1	-0.267184	-0.621134	-0.35395	202
BARD1	-0.85662	-1.25435	-0.397725	203	ABCD3	-0.0639416	-0.504023	-0.440082	203						CFHR1	0.386733	0.0334542	-0.353279	203
RFWD2	-0.508542	-0.906056	-0.397513	204	CCDC34	-0.152996	-0.592815	-0.439819	204						CD69	0.359492	0.00648776	-0.353004	204
RBM48	-0.540624	-0.937281	-0.396657	205	HIST1H1E	-0.522222	-0.961893	-0.439672	205						RCCD1	0.308737	-0.044055	-0.352792	205
KIAA1524	-0.696471	-1.09309	-0.396614	206	AIG1	0.591864	0.152959	-0.438906	206						DYNC1H1	-0.940238	-1.29262	-0.352387	206
SAFB	-0.483674	-0.879504	-0.395829	207	OR4D2	0.133979	-0.303972	-0.437951	207						FAM134C	0.366477	0.0142035	-0.352274	207
NOM1	-0.885684	-1.28141	-0.395722	208	GINS1	-0.947807	-1.38561	-0.437806	208						NFE2L2	-0.255452	-0.607557	-0.352105	208
PDS5B	-0.299313	-0.694619	-0.395306	209	LCA5	0.504321	0.0665259	-0.437795	209						SWSAP1	0.020024	-0.331624	-0.351648	209
RPL22L1	-0.464711	-0.859782	-0.395071	210	RMI1	-0.28776	-0.725504	-0.437743	210						MCOLN2	0.232599	-0.118626	-0.351225	210
KIF4B	-0.0151031	-0.409295	-0.394191	211	YAE1D1	0.0857286	-0.351164	-0.436893	211						PSMC3IP	-0.0634453	-0.414028	-0.350582	211
AVL9	0.268633	-0.125417	-0.39405	212	CCDC71L	-0.163545	-0.600257	-0.436711	212
FNDC8	0.128017	-0.265663	-0.393679	213	CASQ1	0.263781	-0.170945	-0.434726	213
RAD21	-0.62271	-1.01617	-0.393464	214	RPL37A	-0.945807	-1.37941	-0.433603	214
IGFLR1	-0.223453	-0.616784	-0.393332	215	NDUFS8	0.0859198	-0.346898	-0.432818	215
CAPG	-0.0936614	-0.486314	-0.392653	216	PPCS	-0.590052	-1.02281	-0.432762	216
					AIMP1	0.393134	-0.0389141	-0.432048	217
					ARHGAP11A	0.198801	-0.233118	-0.431919	218
					AMDHD2	-0.19706	-0.628943	-0.431883	219
					GPX8	0.258823	-0.172909	-0.431732	220
					MTBP	-0.253261	-0.684315	-0.431054	221
					TSR3	-0.015802	-0.4465	-0.430698	222
					OR7C1	0.268862	-0.16137	-0.430232	223
					DCAF6	0.264657	-0.165013	-0.42967	224
					SENP5	0.00582383	-0.423771	-0.429595	225
					ZNF300	0.40365	-0.0253984	-0.429048	226
					SNAPC1	0.022161	-0.406367	-0.428528	227
					NDUFAF4	0.24658	-0.181588	-0.428168	228
					NUBPL	0.426128	-0.00181891	-0.427947	229
					RFC4	-0.14046	-0.568179	-0.427718	230
					XPO5	-0.542613	-0.970288	-0.427675	231
					VPS36	0.134024	-0.29351	-0.427534	232
					MYB	0.384054	-0.0433992	-0.427453	233
					NSMCE4A	-0.249969	-0.677362	-0.427393	234
					OR2A1	-0.2941	-0.721449	-0.427349	235
					CAV1	0.136205	-0.291087	-0.427292	236
					ZNF343	0.209696	-0.217594	-0.42729	237
					ZNF599	0.0757374	-0.351164	-0.426902	238
					AGMO	0.305612	-0.121143	-0.426756	239
					GGPS1	-0.767764	-1.19328	-0.425514	240
					YIPF4	0.334589	-0.0905194	-0.425108	241
					DDX39B	-0.103103	-0.525951	-0.422848	242
