# Supplementary material for: CRISPR screens reveal genetic determinants of PARP inhibitor sensitivity and resistance in prostate cancer
Source: Springer Nature journal article supplement (doi:10.1038/s41467-023-35880-y), 2023-01-17
Supplement: MOESM6 [file 41467_2023_35880_MOESM6_ESM.xlsx]

## Sheet: All positive selection
Supplementary Data 4. Genes identified from positive selection
LNCaP					C4-2B					22Rv1					DU145
Gene	DMSO	Olaparib	diff	positive rank	Gene	DMSO	Olaparib	diff	positive rank	Gene	DMSO	Olaparib	diff	positive rank	Gene	DMSO	Olaparib	diff	positive rank
TP53	0.952742	3.33365	2.38091	1	PARG	-0.165855	2.2774	2.44325	1	TP53	0.242707	3.09726	2.85455	1	SMAD4	0.28636	1.64212	1.35576	1
PARG	-0.301635	1.82255	2.12418	2	PARP2	0.16457	1.80473	1.64016	2	PARP1	-0.454939	1.78023	2.23516	2	ZEB1	-0.817326	0.354524	1.17185	2
PARP1	-0.472132	1.02155	1.49368	3	PARP1	0.0160536	1.53167	1.51562	3	CHEK2	0.313256	2.47369	2.16043	3	CUL4A	-1.12536	-0.0120755	1.11328	3
USP28	0.847648	2.19494	1.34729	4	FAM118A	-0.401373	1.01721	1.41859	4	KLHL15	0.0403269	1.24844	1.20812	4	ACTR8	-0.34547	0.700955	1.04642	4
FBXO42	0.342796	1.61814	1.27534	5	PTDSS1	-1.16539	0.235329	1.40072	5	USP28	0.305781	1.49708	1.1913	5	PTDSS1	-0.989572	0.0401493	1.02972	5
CCDC6	0.00513093	1.15267	1.14754	6	ATIC	-1.4151	-0.049738	1.36536	6	METTL5	0.0198689	1.15035	1.13048	6	MAU2	-0.915286	-0.0258534	0.889433	6
UMPS	-1.68176	-0.578811	1.10295	7	USP48	-0.25132	1.09989	1.35121	7	EIF3A	-1.36267	-0.286308	1.07637	7	ITGAV	-1.4419	-0.560393	0.881509	7
ADPRHL2	-0.122427	0.952411	1.07484	8	GGNBP2	0.0820918	1.42912	1.34703	8	YLPM1	-0.525368	0.546536	1.0719	8	TFAM	-1.30892	-0.471747	0.837174	8
CHEK2	0.64922	1.71096	1.06174	9	NOP58	-2.20797	-1.0216	1.18637	9	RBM47	-0.679957	0.36134	1.0413	9	INO80B	-0.385804	0.428203	0.814007	9
SOD2	-1.17028	-0.166782	1.0035	10	DPF2	-0.297645	0.860142	1.15779	10	EMC3	-0.403302	0.616143	1.01945	10	INO80C	0.0383488	0.842753	0.804405	10
SLC43A1	-0.816295	0.0865672	0.902862	11	FAM118B	0.0226135	1.16897	1.14636	11	BRAF	-0.513465	0.496284	1.00975	11	ATIC	-1.35036	-0.548217	0.802141	11
PARP2	-0.0452438	0.856142	0.901386	12	ADPRHL2	0.37407	1.49416	1.12009	12	YTHDF3	-0.372277	0.599081	0.971358	12	CEP350	-0.217592	0.532822	0.750415	12
TYMS	-0.642057	0.258059	0.900116	13	FBXO42	0.163478	1.27704	1.11356	13	AQP3	0.0140472	0.944912	0.930865	13	CSNK1A1	-0.473642	0.274642	0.748284	13
H2AFZ	-0.928257	-0.0714986	0.856758	14	TYMS	-0.760458	0.304778	1.06524	14	RB1	0.0305233	0.959681	0.929157	14	PPA1	-0.865678	-0.160996	0.704681	14
MED23	-0.225108	0.586521	0.811629	15	SPOP	-0.5382	0.520246	1.05845	15	TASP1	-0.6775	0.250436	0.927936	15	GTPBP4	-0.996751	-0.307686	0.689066	15
TP53BP1	0.563097	1.36716	0.80406	16	SMARCC1	-0.575966	0.478939	1.05491	16	KCTD5	-0.132489	0.794418	0.926907	16	ATP6V0C	-1.92503	-1.23919	0.685834	16
CCDC47	-0.524669	0.256437	0.781106	17	CARM1	-0.155492	0.879938	1.03543	17	HAUS3	-1.01954	-0.11036	0.909177	17	USP1	-0.62588	0.0591126	0.684993	17
CAD	-1.23152	-0.477534	0.75399	18	EYA3	0.0898795	1.0745	0.984625	18	MED13	-0.0572133	0.84721	0.904423	18	KCTD5	0.525038	1.20527	0.680233	18
FTSJ3	-1.44863	-0.713123	0.735508	19	PPAT	-1.08664	-0.105763	0.980874	19	CCDC47	-0.742916	0.160327	0.903242	19	EPAS1	-0.182442	0.488687	0.671129	19
CENPH	-0.434472	0.282728	0.7172	20	CHEK2	0.919299	1.88042	0.96112	20	S100A7L2	-0.102754	0.796299	0.899053	20	FECH	-0.690454	-0.0209963	0.669458	20
SLC38A2	-0.256791	0.453163	0.709954	21	GAPVD1	-0.49314	0.466167	0.959308	21	GPR110	-0.144826	0.741946	0.886772	21	ACTR5	0.307142	0.97387	0.666728	21
CD86	-0.083324	0.611234	0.694558	22	CNOT11	-0.333845	0.620069	0.953914	22	FAM118B	0.0180507	0.89716	0.879109	22	RASA1	0.112857	0.779372	0.666515	22
DRG2	-0.506831	0.182621	0.689452	23	THAP11	-0.495393	0.455796	0.95119	23	ZNF592	-0.972506	-0.104567	0.867939	23	ELAVL1	-0.140362	0.516839	0.657202	23
RMND1	-0.34869	0.340754	0.689444	24	XRCC4	-0.540866	0.398007	0.938873	24	ROPN1L	-0.296515	0.564616	0.861131	24	RPL7	-1.41043	-0.758867	0.651561	24
PLK1	-1.04354	-0.355413	0.688124	25	BAP1	-0.46316	0.451139	0.914299	25	PNMA3	0.418158	1.27475	0.856594	25	ARRDC3	0.229324	0.868186	0.638863	25
NOC3L	-0.764896	-0.101943	0.662953	26	PRKDC	-2.18607	-1.27203	0.914041	26	SC5D	0.0623449	0.912401	0.850056	26	TRIP12	-0.488223	0.150623	0.638845	26
MSANTD4	-0.0336728	0.627165	0.660838	27	E2F3	-0.152785	0.754638	0.907423	27	CASZ1	-0.165023	0.684781	0.849805	27	GFPT1	-0.774635	-0.138952	0.635683	27
CHKA	-0.355322	0.303543	0.658865	28	TBL1X	-0.63269	0.2729	0.90559	28	GPATCH1	-0.51604	0.333448	0.849488	28	PPRC1	-1.35025	-0.720577	0.629677	28
GGPS1	-0.816155	-0.157684	0.65847	29	GFPT1	-1.32472	-0.42235	0.902367	29	FGF10	-0.104931	0.737299	0.842231	29	GCN1L1	-0.295677	0.324461	0.620138	29
BUB1	-0.561947	0.0953567	0.657303	30	SMARCA4	-1.12863	-0.239509	0.889117	30	FCGR3A	0.0435657	0.884814	0.841248	30	USP34	0.262911	0.882614	0.619703	30
KAT6A	-0.779854	-0.129691	0.650163	31	CDK13	-0.722731	0.162064	0.884795	31	MPG	-0.236297	0.602031	0.838328	31	BRD1	-0.23382	0.378075	0.611896	31
IPO5	-0.226107	0.41984	0.645947	32	DLGAP5	-0.846147	0.0306349	0.876782	32	EMC6	-0.375025	0.46084	0.835865	32	PARG	-0.188208	0.422044	0.610252	32
EMC3	-0.722821	-0.0911145	0.631706	33	TP53	0.0910658	0.962747	0.871681	33	PHTF2	-0.346777	0.486552	0.833329	33	FPGS	-0.836739	-0.226963	0.609776	33
GPAA1	-0.700801	-0.0696542	0.631147	34	XPO7	-0.0456914	0.816761	0.862452	34	SELT	-0.0921303	0.739148	0.831278	34	ACVR1	0.322893	0.931645	0.608752	34
USP48	-0.391515	0.235621	0.627136	35	MPHOSPH10	-2.35581	-1.49906	0.856743	35	NUP88	-1.42085	-0.590172	0.830678	35	BMPR1A	0.191517	0.78751	0.595994	35
PPP2R2A	-0.0908041	0.535105	0.625909	36	CCDC6	0.146149	0.985154	0.839004	36	MED13L	-0.556853	0.266492	0.823345	36	YARS2	-2.08192	-1.48942	0.592504	36
LIPT2	-0.815422	-0.189964	0.625458	37	SETD2	-0.693433	0.145019	0.838451	37	TMC1	-0.279982	0.537887	0.817868	37	PRKDC	-1.28576	-0.694189	0.591573	37
MTHFD1	-0.72063	-0.0970233	0.623607	38	CHD8	-0.0981174	0.738879	0.836996	38	METTL10	-0.162559	0.655165	0.817724	38	CPOX	-0.869158	-0.280344	0.588814	38
USP16	-0.262174	0.359461	0.621635	39	NUP214	-1.23108	-0.400464	0.830616	39	RAF1	-0.621283	0.196392	0.817676	39	OR5L1	-0.145844	0.44181	0.587654	39
ADPRM	0.248441	0.858481	0.61004	40	ACTR1A	-0.843721	-0.0182797	0.825441	40	GOLIM4	-0.287329	0.529701	0.81703	40	PSMD1	-1.42954	-0.843771	0.585773	40
MANSC4	-0.0443123	0.56448	0.608792	41	UPF1	-1.47655	-0.661344	0.815206	41	NFAT5	-0.41893	0.396305	0.815235	41	MFN2	-1.44294	-0.857612	0.585333	41
TCEB3	0.289603	0.896267	0.606664	42	SCD	-0.662549	0.151924	0.814473	42	TP53BP1	-0.289719	0.521464	0.811183	42	CERS2	-0.956851	-0.375028	0.581823	42
NUP160	-1.59067	-0.985995	0.604675	43	TPX2	-1.87341	-1.06594	0.807473	43	CRKL	-0.466029	0.341795	0.807823	43	ESPL1	-1.56279	-0.989187	0.573604	43
TFB1M	-1.24771	-0.643425	0.604284	44	ATL2	-1.10333	-0.307114	0.796211	44	HMGA2	-0.154775	0.652144	0.806919	44	MCC	-0.199972	0.370925	0.570897	44
MED16	-0.303887	0.300176	0.604062	45	KIF18A	-1.37049	-0.57785	0.792638	45	BRD7	-0.182536	0.613233	0.79577	45	PPM1G	-0.573952	-0.0041638	0.569788	45
PPFIA1	-0.14779	0.453726	0.601516	46	RNPC3	-1.6776	-0.886057	0.791543	46	MAPK1	-0.464354	0.325027	0.789382	46	HEATR3	-1.16653	-0.600316	0.56621	46
ZFC3H1	-0.333139	0.265264	0.598403	47	SOX4	0.365243	1.14469	0.779451	47	WDR5	-0.975212	-0.186306	0.788906	47	CAND1	-0.737395	-0.171806	0.565588	47
RAB6A	0.0155425	0.613618	0.598075	48	PRR12	-0.619087	0.159132	0.778219	48	ADPRHL2	-0.0916966	0.697092	0.788789	48	NAA50	-0.848166	-0.285687	0.562479	48
STX12	-0.269874	0.321423	0.591296	49	SBNO2	-0.300849	0.467709	0.768557	49	C1QBP	-1.45287	-0.664659	0.788212	49	PTEN	0.663154	1.2227	0.559544	49
RSL24D1	-1.24862	-0.662454	0.586166	50	SEC23IP	-0.373546	0.390371	0.763917	50	B3GALTL	0.0246582	0.807494	0.782836	50	PEX1	-0.145307	0.413607	0.558914	50
MED24	-1.03537	-0.450609	0.58476	51	PIK3R4	-1.12767	-0.36402	0.763645	51	SCLT1	0.258743	1.03587	0.777126	51	PRIMPOL	0.126428	0.680308	0.55388	51
PPAP2A	0.03531	0.616039	0.580729	52	GPS2	-0.0810208	0.675945	0.756965	52	CACNB2	0.152096	0.926507	0.774411	52	PDCD10	1.00412	1.55587	0.55175	52
FUBP3	-0.120182	0.45804	0.578222	53	KDM2A	-0.912564	-0.158401	0.754163	53	PCSK5	-0.028732	0.744498	0.77323	53	FLCN	-0.240114	0.303951	0.544065	53
CPSF4	-1.08964	-0.516596	0.57304	54	IREB2	-0.892902	-0.142498	0.750405	54	HBS1L	-0.781861	-0.00947728	0.772383	54	TFB1M	-1.07859	-0.537329	0.541262	54
U2AF1	-1.14101	-0.57169	0.569324	55	FAM72D	-0.674824	0.0741802	0.749004	55	TNN	-0.189247	0.578003	0.767251	55	TRIM34	-0.00166774	0.537429	0.539097	55
ATIC	-0.946879	-0.378077	0.568802	56	ANKRD11	-0.534874	0.21331	0.748183	56	DAPL1	0.186472	0.949463	0.762991	56	FKBPL	-0.600235	-0.0634407	0.536794	56
RALGAPB	0.184322	0.752237	0.567916	57	ILF3	0.0169806	0.759013	0.742032	57	CAMKMT	0.0866823	0.842661	0.755979	57	PEX13	0.156895	0.692176	0.535281	57
PET117	-0.44422	0.120563	0.564783	58	PSMD10	-0.76989	-0.0312116	0.738678	58	PSMA3	-1.46841	-0.71324	0.755173	58	EIF6	-1.56265	-1.03079	0.531866	58
AP1G1	-0.906415	-0.349571	0.556844	59	FLVCR1	-1.82314	-1.08854	0.7346	59	HIST1H4K	-0.764732	-0.0100084	0.754723	59	ANKRD36	-0.426782	0.10106	0.527842	59
PHF6	-0.343947	0.207811	0.551758	60	SLC7A1	-0.713105	0.0198991	0.733004	60	MAFA	-0.338829	0.414806	0.753635	60	SLC7A5	-0.840557	-0.314394	0.526163	60
FRAT1	-0.259174	0.291925	0.551099	61	HNRNPUL2	0.00434717	0.735477	0.731129	61	ZNF155	-0.136075	0.610987	0.747062	61	TNKS2	-0.306915	0.218935	0.525849	61
METTL15	-0.0912802	0.458954	0.550235	62	ZC3H15	-0.588792	0.14154	0.730333	62	MED6	-0.884512	-0.138401	0.74611	62	TMED2	-0.602605	-0.0785408	0.524064	62
ZNF689	-0.211092	0.338575	0.549668	63	FUBP3	0.0737751	0.804073	0.730298	63	ZNF706	-0.436613	0.30692	0.743534	63	RRAGA	-0.345144	0.177713	0.522857	63
WDR5	-1.33875	-0.790707	0.548039	64	SREBF1	-0.823575	-0.0943861	0.729189	64	KIF14	-0.979419	-0.243651	0.735768	64	PDCD11	-0.757873	-0.236159	0.521714	64
NDUFV1	-0.658973	-0.111766	0.547207	65	CREBZF	-0.222009	0.506014	0.728023	65	COL17A1	-0.0885401	0.64464	0.73318	65	ANKRD49	-0.591006	-0.069329	0.521677	65
USP10	-1.28015	-0.735485	0.544662	66	APEX1	-0.155679	0.571735	0.727415	66	CCDC175	-0.109396	0.623319	0.732715	66	NELFCD	-1.26021	-0.740142	0.520066	66
SLC7A1	-0.452956	0.0911827	0.544139	67	L2HGDH	-0.436642	0.287701	0.724343	67	TMEM254	0.126505	0.857505	0.731	67	ADRM1	-0.36869	0.151158	0.519848	67
CTPS1	0.122004	0.663581	0.541577	68	TNRC6A	-0.0362245	0.682739	0.718963	68	CDKN1A	0.214925	0.943171	0.728246	68	UROS	-0.549178	-0.0309017	0.518277	68
TAZ	-0.51411	0.0194729	0.533583	69	GCLC	-0.955521	-0.236822	0.718699	69	EMG1	-0.769545	-0.0425512	0.726993	69	POLR3A	-1.47791	-0.961052	0.516856	69
ACO2	-0.874573	-0.341445	0.533127	70	ANKRD52	-0.289199	0.42703	0.716229	70	EHF	-0.0937989	0.629599	0.723398	70	HBS1L	-0.673331	-0.157196	0.516135	70
CTDSPL2	-0.321366	0.210665	0.532031	71	DDX41	-1.46292	-0.746882	0.716038	71	HSP90B1	-0.94927	-0.225933	0.723337	71	SAR1A	0.453601	0.965384	0.511783	71
ATP2B1	-0.386254	0.143992	0.530247	72	NXT1	-0.316336	0.39768	0.714017	72	PFDN4	-0.189267	0.532076	0.721343	72	FAM151B	-0.0156973	0.489192	0.504889	72
IMPDH2	-0.85084	-0.320899	0.529942	73	QARS	-1.6764	-0.962966	0.713438	73	GNAT1	-0.0582478	0.662022	0.72027	73	RBM10	-1.18093	-0.676594	0.504334	73
FDX1	-0.531794	-0.00724482	0.524549	74	HNRNPF	-0.78602	-0.0727144	0.713306	74	WDR20	-0.015049	0.704216	0.719265	74	JUNB	-0.66101	-0.15719	0.503819	74
DYNLL2	0.211108	0.73561	0.524502	75	CTC1	-1.39305	-0.681876	0.711173	75	ZNF117	-0.222328	0.496031	0.718359	75	CSN2	-0.16726	0.334149	0.501409	75
YWHAE	-1.25953	-0.735264	0.524264	76	NUP155	-1.29445	-0.597417	0.697034	76	TUBGCP5	-1.29976	-0.584396	0.715368	76	PEX3	0.127345	0.62676	0.499415	76
DHFR	-0.784939	-0.261533	0.523407	77	CPSF4	-0.609952	0.0860389	0.695991	77	CEP135	-0.491789	0.2218	0.71359	77	DNAJC11	-1.32609	-0.826692	0.4994	77
RPP25L	-0.62348	-0.101474	0.522006	78	MYBL2	-0.380241	0.314557	0.694799	78	SOS1	-0.250392	0.462141	0.712533	78	SMUG1	-0.447564	0.0492555	0.496819	78
DDX21	-1.44598	-0.926217	0.519767	79	NDRG3	-0.515251	0.177999	0.69325	79	PPP1R15B	-0.83363	-0.131455	0.702175	79	POGK	-0.0979963	0.397656	0.495652	79
UXS1	-0.403947	0.115752	0.519699	80	PPP2R2A	-0.478477	0.203917	0.682395	80	GABARAP	0.170978	0.873025	0.702048	80	TIMM23B	-0.612172	-0.119937	0.492235	80
PLA2G4B	-0.0143309	0.504616	0.518947	81	HAUS3	-1.40606	-0.723784	0.682274	81	XPO6	-0.737164	-0.0351298	0.702034	81	RBM6	-0.0215771	0.469619	0.491196	81
ZFP36L1	-0.335554	0.181599	0.517153	82	HDAC3	-1.18573	-0.503866	0.681866	82	COMMD1	-0.0624674	0.636199	0.698666	82	PTBP1	-0.974889	-0.487371	0.487518	82
TSHZ3	-0.213513	0.298236	0.511749	83	NUP153	-0.323788	0.355888	0.679676	83	UBXN4	-0.0165115	0.675279	0.69179	83	HTR1A	-0.581961	-0.0963757	0.485585	83
GHITM	-0.713324	-0.203103	0.510221	84	GART	-0.983199	-0.303834	0.679365	84	DPM1	-0.151633	0.539755	0.691388	84	CDK2	-0.379005	0.102463	0.481468	84
KAT7	-0.389167	0.118786	0.507953	85	RB1	0.224492	0.901942	0.677449	85	SCN10A	-0.246281	0.445025	0.691306	85	SETDB1	-1.00782	-0.526762	0.481063	85
OR2B2	-0.0841245	0.422411	0.506535	86	MSL2	-0.468599	0.206758	0.675357	86	EMC7	-0.0883991	0.602295	0.690694	86	DDX5	-0.675052	-0.194187	0.480865	86
PPAT	-0.730099	-0.223622	0.506477	87	PRDM15	-0.312183	0.362718	0.6749	87	OXCT1	-0.0730228	0.617425	0.690448	87	UBE2S	-0.611692	-0.137494	0.474198	87
MMP17	0.112543	0.617228	0.504685	88	SOD2	-0.600079	0.0743586	0.674437	88	OR52I1	0.0746734	0.764879	0.690205	88	FGFR1OP	-0.204604	0.26956	0.474164	88
TPSD1	-0.263276	0.241026	0.504302	89	AHCYL1	-0.630014	0.0433891	0.673403	89	PRKACA	-0.265804	0.42161	0.687414	89	PGP	-0.918153	-0.444528	0.473625	89
MTF2	-0.340528	0.162195	0.502723	90	CCNE2	-0.264538	0.396599	0.661137	90	CCDC160	0.567369	1.25371	0.686345	90	NIPBL	-0.290542	0.182618	0.47316	90
NEO1	-0.279697	0.222698	0.502395	91	CASZ1	-0.674073	-0.0153285	0.658744	91	S100G	0.409294	1.0943	0.685002	91	TFRC	-1.32573	-0.852724	0.473009	91
PDCD11	-1.00772	-0.505962	0.501754	92	KAT7	-1.07822	-0.423537	0.654688	92	ATMIN	-0.22634	0.458122	0.684462	92	NUP85	-1.34278	-0.873993	0.46879	92
BCOR	-0.71912	-0.219382	0.499738	93	E2F7	-0.399391	0.254431	0.653822	93	SPACA5	0.0932799	0.777323	0.684044	93	MRTO4	-0.860594	-0.392355	0.468239	93
MAP2K4	-0.00353189	0.495163	0.498694	94	TMEM208	-0.361775	0.290442	0.652217	94	CCDC6	-0.848913	-0.165948	0.682964	94	CRTC2	-0.156395	0.311822	0.468216	94
PGR	-0.10266	0.395371	0.49803	95	MSMO1	-0.151559	0.500268	0.651827	95	ZCRB1	-0.41661	0.265362	0.681972	95	BTAF1	-0.256284	0.210445	0.466729	95
ZNF835	-0.101851	0.394598	0.49645	96	USP16	0.130888	0.778901	0.648012	96	OR8H1	0.234685	0.915931	0.681246	96	COQ3	-0.666146	-0.201072	0.465075	96
ARIH1	-1.01065	-0.514773	0.495872	97	MAPKAPK5	-0.525583	0.121678	0.647261	97	SUGP1	-1.01342	-0.333202	0.680218	97	RRM2	-1.30361	-0.84042	0.463188	97
TRPT1	-0.267344	0.228287	0.495631	98	KMT2E	-0.317236	0.325776	0.643012	98	OR6K6	-0.250151	0.426379	0.67653	98	RBM5	-0.19407	0.26814	0.462211	98
RBPJ	-0.0882495	0.406787	0.495036	99	MYC	-1.57183	-0.928912	0.642916	99	DOK6	-0.0374924	0.63773	0.675222	99	CSRP2BP	-0.373498	0.085433	0.458931	99
NOSIP	-0.484722	0.00542529	0.490147	100	NR2F2	-0.16003	0.48242	0.64245	100	HTATSF1	-0.578152	0.0967138	0.674865	100	FAF2	-0.369302	0.089157	0.458459	100
GTPBP6	-0.996675	-0.507249	0.489426	101	CCNE1	-1.01448	-0.372599	0.64188	101	NCOA2	-0.514211	0.158494	0.672705	101	DNAJC13	-0.650587	-0.192684	0.457903	101
ATXN2	-0.302472	0.186032	0.488504	102	SIRT1	0.164659	0.806235	0.641575	102	SCN7A	0.281858	0.954258	0.672399	102	ZMIZ2	-0.0437379	0.411365	0.455103	102
RGPD6	-0.216539	0.26765	0.48419	103	PHIP	-0.697803	-0.0567032	0.6411	103	AIFM2	0.00700883	0.678426	0.671417	103	PEX12	-0.108724	0.346169	0.454893	103
LRRC41	-0.372046	0.111709	0.483755	104	YWHAB	-0.610387	0.0283814	0.638769	104	OR5D14	0.0923669	0.763108	0.670741	104	GOSR1	-0.239739	0.214921	0.45466	104
USP14	-0.102907	0.37999	0.482897	105	CSK	0.0519977	0.690323	0.638326	105	SMN2	-0.682821	-0.0145663	0.668255	105	DHX35	-0.408937	0.0448175	0.453754	105
SCN7A	0.339493	0.822342	0.482849	106	MMD	-0.472651	0.161905	0.634556	106	PLOD2	-0.10648	0.560417	0.666897	106	LARS2	-1.41058	-0.95721	0.453371	106
SNAI3	-0.110757	0.371654	0.482411	107	RPTOR	-1.90054	-1.26704	0.633496	107	TMEM164	0.11743	0.783494	0.666064	107	CDK15	-0.0295956	0.422645	0.45224	107
SARAF	-0.0627914	0.41948	0.482271	108	U2AF2	-1.30656	-0.673584	0.632978	108	PPIE	-0.175514	0.489767	0.66528	108	NFKBIZ	0.224835	0.676612	0.451777	108
TRA2B	-0.447475	0.032068	0.479543	109	FASTKD2	-0.78211	-0.150696	0.631414	109	HNRNPDL	-0.25571	0.408665	0.664375	109	DCPS	-1.0058	-0.554057	0.451738	109
KLHDC10	0.00961178	0.488975	0.479363	110	PHF23	-0.220226	0.407092	0.627318	110	MAD1L1	-1.06919	-0.405319	0.66387	110	PDCD6IP	-0.973568	-0.522107	0.45146	110
NAA60	0.0244545	0.500258	0.475804	111	TIMM13	-1.28253	-0.66429	0.618243	111	PIGP	0.00741248	0.671203	0.663791	111	ZNF622	-0.470362	-0.0193911	0.450971	111
ZNF14	0.211227	0.68698	0.475753	112	UBE2S	-1.09053	-0.473964	0.616567	112	CNR1	-0.18174	0.481118	0.662858	112	PMM2	-0.881086	-0.430564	0.450523	112
ZNF384	-0.129983	0.344787	0.47477	113	ANGEL2	-0.3031	0.313102	0.616202	113	GAB1	0.0972732	0.759016	0.661743	113	GLTSCR2	-0.878695	-0.428203	0.450492	113
DLG4	-0.149685	0.322812	0.472497	114	ATPAF2	-0.54734	0.0687754	0.616115	114	TRMT10C	-0.754112	-0.0929306	0.661181	114	MARS2	-1.59887	-1.15	0.448868	114
SECISBP2	-0.653986	-0.181767	0.472219	115	ETNK1	-0.776255	-0.161477	0.614778	115	INTS10	-1.17935	-0.519375	0.659974	115	TARS	-0.800523	-0.35207	0.448453	115
TRMT6	-0.919679	-0.449466	0.470213	116	FETUB	-0.395336	0.2192	0.614537	116	MEGF6	-0.104008	0.555229	0.659237	116	BOP1	-1.01286	-0.565372	0.447492	116
SHROOM2	-0.128673	0.341326	0.47	117	EMC2	-0.776804	-0.162612	0.614192	117	TECR	-0.654296	0.00277813	0.657074	117	SMARCA5	-0.895563	-0.448233	0.44733	117
HMBS	-0.540273	-0.0708237	0.469449	118	NKX3-1	0.184016	0.796964	0.612947	118	PINK1	-0.127995	0.528669	0.656664	118	TPX2	-1.10877	-0.661458	0.447313	118
MRPS18C	-0.277991	0.190826	0.468817	119	HTRA2	-1.35767	-0.745385	0.612284	119	MSX2	0.00545126	0.661802	0.65635	119	OR6S1	-0.0905348	0.356764	0.447299	119
BMPR1A	-0.136406	0.332136	0.468542	120	EIF2AK3	-0.349965	0.262178	0.612143	120	TTLL11	-0.200152	0.455935	0.656087	120	NUP43	-0.614482	-0.167896	0.446586	120
GFM2	-0.904856	-0.436382	0.468474	121	EEF1A1	-1.56886	-0.956727	0.612136	121	CACNA2D1	-0.0905468	0.565332	0.655879	121	DPAGT1	-1.61862	-1.17408	0.444536	121
UGDH	-0.137411	0.330132	0.467543	122	CTPS1	-0.209531	0.400037	0.609567	122	BMP5	0.0614255	0.715099	0.653674	122	ECHS1	-0.688244	-0.244706	0.443537	122
H2AFY	-0.102578	0.364513	0.467091	123	MBTD1	-0.254476	0.339422	0.593898	123	HLA-DRA	0.0913026	0.744532	0.653229	123	CPSF4	-0.93431	-0.491174	0.443136	123
YARS2	-2.35724	-1.89062	0.466626	124	UBE2G2	-0.317086	0.274761	0.591847	124	STOX1	0.201965	0.854715	0.65275	124	CCDC108	-0.0970995	0.345026	0.442126	124
RBMXL2	-0.228929	0.236715	0.465644	125	SMARCB1	-0.919293	-0.327581	0.591712	125	IFIT1B	0.170425	0.822363	0.651938	125	PARS2	-1.2931	-0.851114	0.441985	125
HMGN5	0.460541	0.926143	0.465602	126	MRPL39	-1.32337	-0.734226	0.589142	126	WDR66	-0.715822	-0.064423	0.651399	126	SPIRE1	-0.0667116	0.37503	0.441742	126
CD82	-0.0277343	0.437629	0.465364	127	DROSHA	-1.07437	-0.489689	0.584677	127	CTAGE6	-0.431246	0.218129	0.649375	127	PAK7	0.00117517	0.441996	0.44082	127
PARN	-0.717391	-0.252085	0.465306	128	TRAPPC11	-1.25838	-0.678119	0.580256	128	SNX12	0.155876	0.803899	0.648022	128	NOP58	-1.07189	-0.632173	0.439721	128
RNF11	0.171431	0.635599	0.464168	129	CCNI	-0.138394	0.440363	0.578757	129	CDKN2A	-0.0535489	0.593943	0.647492	129	NCKAP5L	-0.274549	0.165036	0.439585	129
TOP2B	-0.658117	-0.194588	0.463529	130	RTFDC1	-1.12961	-0.553196	0.576413	130	USP3	-0.145289	0.498471	0.64376	130	TAOK1	0.0184597	0.456731	0.438271	130
GPR179	-0.193258	0.269652	0.46291	131	CCAR1	-1.64056	-1.06443	0.576127	131	PFN4	0.0175125	0.66057	0.643058	131	KYNU	-0.0784795	0.359735	0.438215	131
ITGB5	-0.486876	-0.0241069	0.462769	132	FAM207A	0.0454144	0.620398	0.574983	132	SCML2	0.240729	0.88285	0.642121	132	FRMPD2	-0.117938	0.320039	0.437977	132
ZNF454	0.144992	0.607334	0.462342	133	GTF2A1	-0.320371	0.25339	0.573762	133	HBEGF	0.0153899	0.657145	0.641755	133	LAMTOR2	-0.938193	-0.501159	0.437034	133
NUP43	-0.615248	-0.153619	0.461629	134	USP9X	-0.583319	-0.00963171	0.573687	134	FBXO42	-0.140973	0.499181	0.640155	134	RTTN	-0.772176	-0.336745	0.435432	134
ACVR1	-0.16412	0.296938	0.461057	135	ACTR1B	-0.240929	0.331121	0.57205	135	SNAP23	-0.295816	0.344193	0.640009	135	MAP2	-0.0613801	0.373997	0.435378	135
PSMD14	-0.786157	-0.325139	0.461019	136	MTPAP	-1.34676	-0.775079	0.571683	136	GPR132	-0.217618	0.421252	0.63887	136	NFKB1	0.129017	0.564004	0.434987	136
ATP6AP2	-0.388116	0.0716304	0.459746	137	DHRS4	-0.130572	0.440634	0.571206	137	KIAA1109	0.0783011	0.716749	0.638448	137	CCDC34	-0.0867477	0.345444	0.432192	137
CLTC	-1.45786	-1.00062	0.457234	138	USP33	-0.149667	0.420176	0.569843	138	ZNF790	0.180335	0.818107	0.637772	138	PARD3	0.0326706	0.464452	0.431782	138
RAN	-1.68164	-1.22448	0.457157	139	NFYB	-0.59634	-0.0269758	0.569364	139	SCO1	-0.675887	-0.0395694	0.636318	139	SMCHD1	0.0494633	0.479289	0.429826	139
AVEN	-0.0445094	0.412625	0.457134	140	FOXA1	-1.60398	-1.03613	0.567849	140	MLLT6	-0.702541	-0.0666077	0.635933	140	SRC	-0.355254	0.0738877	0.429141	140
RGS5	-0.164008	0.292417	0.456426	141	EIF4A1	-1.63648	-1.06889	0.567593	141	LONP1	-1.3576	-0.721733	0.635867	141	DYDC1	0.00963899	0.438219	0.42858	141
DDX28	-1.02597	-0.569657	0.456308	142	GNL3	-1.35417	-0.787045	0.567125	142	ASCL2	-0.142323	0.491017	0.633341	142	FAM122C	0.0110691	0.438506	0.427437	142
ANGEL2	-0.243199	0.212303	0.455502	143	ARL10	-0.744751	-0.177658	0.567093	143	TRMT11	-0.176608	0.454218	0.630826	143	CBR4	0.0262839	0.452913	0.426629	143
NAA15	-0.82268	-0.367221	0.455459	144	NUP107	-0.694561	-0.127924	0.566637	144	RND1	-0.0859268	0.544199	0.630126	144	ZNF217	-0.426887	-0.00118216	0.425705	144
PDE12	-0.804859	-0.350019	0.45484	145	RNF216	-0.672504	-0.107201	0.565303	145	MUC7	0.249956	0.879759	0.629803	145	PSTPIP2	-0.0222894	0.403113	0.425402	145
CARNS1	-0.137733	0.316102	0.453835	146	CENPT	-0.918885	-0.353679	0.565205	146	OR5P3	0.124685	0.754358	0.629672	146	EFEMP1	-0.137371	0.287786	0.425156	146
BPTF	-0.92796	-0.475048	0.452913	147	PFAS	-1.1214	-0.562172	0.559228	147	P2RX6	-0.25245	0.376997	0.629447	147	OXCT1	-0.24016	0.184875	0.425035	147
ZNF706	-0.372962	0.0793445	0.452307	148	YY1	-0.743102	-0.18445	0.558652	148	ZNF347	0.0266297	0.655812	0.629182	148	CDKL4	0.047077	0.471378	0.424301	148
EMC1	-0.629863	-0.177598	0.452265	149	AFG3L2	-1.23644	-0.679011	0.557428	149	GMEB1	-0.427116	0.20166	0.628776	149	NMD3	-1.00477	-0.580552	0.424215	149
PAPSS1	-0.247117	0.204018	0.451134	150	PRKAG1	-0.876843	-0.320353	0.55649	150	SLX4IP	0.11853	0.743682	0.625152	150	SLC4A7	-0.205033	0.218484	0.423517	150
LMO2	-0.0807074	0.37041	0.451118	151	CSE1L	-1.69624	-1.14287	0.553368	151	PIGA	0.0338642	0.658325	0.624461	151	ING3	-0.22344	0.199729	0.423169	151
ACTL6A	-1.10776	-0.656888	0.450876	152	FBXO22	0.129748	0.681927	0.552179	152	EP300	-0.507004	0.116932	0.623936	152	CDC5L	-1.16067	-0.742166	0.418501	152
NCOA2	-0.557988	-0.107411	0.450577	153	SLC33A1	-0.668394	-0.116647	0.551747	153	EGFR	-0.35142	0.272452	0.623872	153	CARM1	-0.771022	-0.352804	0.418217	153
MTCH2	-0.674355	-0.223903	0.450452	154	CENPE	-0.374409	0.176486	0.550896	154	NLE1	-1.31129	-0.688443	0.622843	154	KMT2E	-0.123999	0.291707	0.415706	154
CCDC87	-0.173819	0.276561	0.450381	155	SLC38A2	-0.613325	-0.0625625	0.550762	155	RSC1A1	-0.124279	0.498182	0.622461	155	PEX10	-0.242281	0.171833	0.414114	155
ZNF671	0.013882	0.464253	0.450371	156	RBBP8NL	-0.141526	0.40865	0.550176	156	SQRDL	-0.0411452	0.580146	0.621291	156	DARS2	-0.928355	-0.514834	0.413521	156
TMEM208	-0.266153	0.182843	0.448996	157	GTPBP6	-1.22366	-0.6764	0.547257	157	TMEM132A	-0.0346391	0.58585	0.620489	157	RD3L	-0.0261892	0.387244	0.413433	157
LMO4	-0.441525	0.00687667	0.448402	158	INADL	-0.202708	0.342806	0.545515	158	AKR1C3	-0.0119309	0.608027	0.619958	158	MECR	-1.1039	-0.690518	0.413383	158
YTHDF2	-0.713749	-0.265502	0.448247	159	THAP7	-0.13586	0.409168	0.545028	159	FGD6	-0.140845	0.479088	0.619933	159	KCNN1	-0.293805	0.119442	0.413246	159
CTSF	-0.064174	0.383954	0.448128	160	YBX1	-0.749657	-0.204993	0.544664	160	DTNBP1	-0.0236219	0.595458	0.61908	160	POLR1C	-1.63122	-1.21813	0.413096	160
RABIF	-0.491327	-0.043264	0.448063	161	MOGS	-0.104819	0.438341	0.54316	161	ASB4	-0.139469	0.479485	0.618954	161	TSPAN12	0.0878738	0.500789	0.412915	161
PYGM	-0.338614	0.109276	0.447891	162	GFM2	-1.37141	-0.828798	0.542609	162	GPR45	-0.213918	0.404691	0.61861	162	PAPD5	-0.526635	-0.114832	0.411803	162
TM7SF2	-0.247844	0.1998	0.447644	163	SRSF8	-0.230849	0.311716	0.542566	163	KEAP1	-0.187672	0.430304	0.617975	163	FAR1	-0.035342	0.374695	0.410037	163
CCDC90B	0.172617	0.620256	0.447639	164	PPFIA1	-0.331373	0.210038	0.541411	164	ATP7A	-0.000377761	0.616724	0.617102	164	BET1L	-0.18449	0.225004	0.409494	164
RNF122	0.0858634	0.532299	0.446435	165	SUPT6H	-0.890351	-0.34923	0.541122	165	NAP1L3	0.20601	0.823082	0.617072	165	CCDC176	-0.206552	0.20203	0.408582	165
TOR3A	-0.120682	0.32513	0.445812	166	EIF4G1	-0.390213	0.148556	0.538769	166	ZC3H18	-1.13956	-0.523946	0.615613	166	SPINK4	-0.0927258	0.314765	0.407491	166
HPCAL4	-0.112353	0.333069	0.445422	167	TFDP1	0.240413	0.778527	0.538114	167	PIGM	-0.730708	-0.115624	0.615083	167	ZNF599	-0.28405	0.122975	0.407025	167
SEC23IP	0.114591	0.559922	0.445331	168	OR13A1	-0.0862354	0.451321	0.537557	168	SSNA1	-0.238811	0.375171	0.613982	168	CNKSR3	0.107466	0.512926	0.40546	168
POP7	-1.07164	-0.626567	0.445069	169	POFUT1	-0.157524	0.379803	0.537327	169	NR1H2	-0.163663	0.450066	0.61373	169	PPP1R12A	-1.34838	-0.945092	0.403287	169
BABAM1	-0.751191	-0.306269	0.444922	170	VPS13D	-0.926724	-0.390926	0.535798	170	KCNH8	-0.0553446	0.558353	0.613698	170	PGS1	-0.967523	-0.564256	0.403267	170
G6PD	-0.619536	-0.17612	0.443417	171	SUDS3	-0.375637	0.158143	0.53378	171	ZNF705A	0.224696	0.837889	0.613193	171	LATS2	0.266089	0.669061	0.402971	171
MIER2	-0.523914	-0.0808086	0.443105	172	MDM4	-1.53469	-1.00222	0.532472	172	CHST9	0.207762	0.820769	0.613008	172	ZP2	-0.195927	0.206301	0.402228	172
ALG14	-0.45671	-0.0139975	0.442713	173	CAND1	-0.889743	-0.357592	0.532151	173	ZNF423	-0.0409975	0.571541	0.612538	173	REL	-0.0632226	0.336923	0.400146	173
ATP6AP1	-0.741836	-0.299952	0.441884	174	QRICH1	-0.514719	0.0164169	0.531136	174	ZNF260	-0.100713	0.5117	0.612413	174	UCHL5	0.185591	0.585627	0.400036	174
DCK	-0.0761822	0.364333	0.440515	175	FDPS	-0.940257	-0.409211	0.531046	175	UBE3C	-0.198081	0.413373	0.611455	175	CDK5	-0.0369907	0.362049	0.39904	175
PRDM14	-0.038984	0.398943	0.437927	176	PABPC1	-0.621936	-0.0915358	0.5304	176	MMGT1	0.166174	0.77759	0.611415	176	LARP1	-0.399082	-0.000131443	0.398951	176
CNOT4	-0.0466809	0.39078	0.437461	177	UBA6	-0.980646	-0.450804	0.529842	177	DNAJC18	-0.239807	0.371072	0.610879	177	TRMT11	-0.263271	0.135363	0.398633	177
TCEB1	-0.409929	0.0266948	0.436624	178	CLIP1	-0.395531	0.134216	0.529748	178	KLRF1	0.0720879	0.682766	0.610678	178	ACO2	-0.890774	-0.492318	0.398456	178
E2F7	0.279766	0.715	0.435235	179	ABAT	-0.367374	0.160307	0.527681	179	RUNX1T1	-0.215608	0.394732	0.61034	179	MIP	-0.235668	0.162787	0.398456	179
BEX2	0.180897	0.61612	0.435223	180	CENPI	-1.11104	-0.5868	0.524237	180	LEPR	0.0943744	0.704251	0.609877	180	WFDC13	0.0381382	0.436447	0.398309	180
LCORL	0.181683	0.61637	0.434687	181	PRKACG	-0.069908	0.454261	0.524169	181	PKMYT1	-0.830674	-0.220833	0.609842	181	MRPS5	-1.19625	-0.798464	0.397784	181
DPAGT1	-1.07878	-0.644095	0.434685	182	RALGAPB	0.112275	0.635585	0.52331	182	MAP3K2	0.27366	0.881961	0.608301	182	UGT2A2	-0.196615	0.200774	0.397389	182
EBNA1BP2	-0.666919	-0.232254	0.434664	183	CPT1A	-0.268263	0.254852	0.523115	183	PRKAA1	-0.233836	0.37417	0.608005	183	HAUS6	-0.304202	0.0916291	0.395831	183
GCSH	-0.348036	0.0863821	0.434418	184	SLTM	-0.318614	0.20326	0.521874	184	NR4A1	-0.33767	0.270179	0.607849	184	PPA2	-0.991164	-0.595401	0.395763	184
MRPL14	-0.895492	-0.461433	0.434059	185	CCDC51	-0.530419	-0.00912022	0.521298	185	TEX10	-0.985151	-0.37736	0.607791	185	CHD8	0.0744596	0.469253	0.394794	185
TNIP2	-0.169126	0.264838	0.433964	186	MED14	-0.964483	-0.443259	0.521224	186	AIG1	-0.18816	0.41922	0.60738	186	ZNF709	-0.0257592	0.369023	0.394783	186
HSPA5	-1.42701	-0.993264	0.433745	187	MORF4L2	-0.0739241	0.44616	0.520084	187	MED17	-1.2386	-0.631249	0.607352	187	PSTK	-0.979125	-0.584433	0.394691	187
EPS8L2	-0.486567	-0.0537512	0.432816	188	KIAA1109	-0.0827679	0.437228	0.519996	188	MED16	-0.638073	-0.0308726	0.607201	188	NHLRC2	-1.52846	-1.13652	0.39194	188
ZFHX3	-0.584801	-0.152124	0.432677	189	PTP4A1	-0.306947	0.212876	0.519823	189	IL18	0.354666	0.961782	0.607116	189	MATR3	-0.495009	-0.103225	0.391784	189
EIF2S1	-1.14651	-0.714155	0.432351	190	MSL1	-0.0926894	0.42451	0.517199	190	CUL4B	0.150286	0.757226	0.60694	190	CERS1	-0.155893	0.234647	0.39054	190
MGAT1	-0.637488	-0.20524	0.432248	191	CENPF	-0.0753088	0.441237	0.516545	191	ZNF507	-0.183607	0.422096	0.605703	191	RRS1	-1.04239	-0.651948	0.390438	191
TMEM41B	-0.8904	-0.458676	0.431724	192	DLST	-0.429356	0.0861491	0.515505	192	DNAJC15	0.364224	0.969868	0.605644	192	MTG2	-1.10183	-0.711476	0.390357	192
DDI2	-0.530544	-0.0989346	0.43161	193	RRM2	-1.56497	-1.05031	0.514664	193	CAV1	-0.390644	0.214202	0.604846	193	ATP13A4	-0.304105	0.0860175	0.390123	193
FBXO11	-0.716771	-0.285313	0.431457	194	SF3A1	-1.42405	-0.909506	0.514544	194	RBM27	-0.662867	-0.0590697	0.603797	194	GART	-1.22655	-0.837456	0.389098	194
GRHL1	-0.137633	0.293693	0.431326	195	ABCF2	-0.732216	-0.219218	0.512998	195	ADAMTS20	-0.317154	0.286299	0.603453	195	HMBS	-0.490085	-0.101389	0.388696	195
KAT8	-0.952629	-0.521593	0.431036	196	SSBP3	-0.401214	0.111692	0.512906	196	EPRS	-0.668167	-0.0661104	0.602057	196	NOP56	-0.495729	-0.107882	0.387846	196
MRPS10	-0.748275	-0.31798	0.430295	197	VSTM4	-0.106885	0.405693	0.512578	197	AFF4	-0.162507	0.439183	0.60169	197	PDE7A	-0.00870954	0.37901	0.38772	197
MCAM	-0.335698	0.0942571	0.429955	198	EI24	-0.598764	-0.086301	0.512463	198	RBBP6	-1.3032	-0.701813	0.601387	198	DAP3	-1.3224	-0.93607	0.38633	198
HCAR2	0.0303416	0.459405	0.429063	199	EHHADH	-0.133419	0.377717	0.511136	199	SH3PXD2B	-0.146007	0.454852	0.600859	199	LIPT2	-1.0638	-0.679004	0.384796	199
MAP7D1	0.108293	0.537144	0.428851	200	MRPL15	-1.49628	-0.985292	0.510989	200	EMC4	-0.0199555	0.580529	0.600484	200	RNMT	-0.603062	-0.218881	0.384181	200
FBLN2	-0.131383	0.297383	0.428767	201	TMPRSS4	-0.228972	0.281278	0.51025	201	FGFR1OP2	-0.330102	0.270246	0.600348	201	SRRM2	-0.811791	-0.429101	0.382691	201
PHIP	-0.722566	-0.294277	0.428289	202	GANAB	-0.647537	-0.137434	0.510102	202	IFRD1	-0.30207	0.297432	0.599502	202	ZNF33B	-0.181367	0.20129	0.382657	202
ELTD1	-0.112524	0.314956	0.42748	203	USP3	0.0196641	0.529637	0.509973	203	SCAPER	-0.19995	0.399252	0.599203	203	NSMCE2	-0.451355	-0.0687305	0.382625	203
GLRX3	-0.551913	-0.124885	0.427028	204	WHSC1L1	0.215512	0.725277	0.509765	204	SS18	-0.259397	0.339448	0.598844	204	TMEM106B	-0.0173273	0.365174	0.382502	204
SOX4	0.12271	0.548488	0.425777	205	PPME1	-0.469329	0.0399013	0.509231	205	TCP10L	-0.279268	0.319392	0.598659	205	AIFM2	-0.214184	0.168269	0.382452	205
OR5J2	0.0902287	0.515969	0.42574	206	ASXL1	-0.306798	0.202068	0.508866	206	SPATA7	0.0762547	0.673991	0.597736	206	ZBTB16	-0.202574	0.179221	0.381795	206
HNRNPD	-0.459949	-0.036141	0.423808	207	LARP4B	0.0629271	0.571141	0.508214	207	CDV3	-0.215374	0.382031	0.597405	207	TECTB	0.0719195	0.453562	0.381643	207
XCL1	-0.102085	0.320365	0.42245	208	BPTF	-0.88064	-0.372495	0.508145	208	CYB561A3	-0.0798921	0.516946	0.596839	208	YLPM1	-0.32065	0.0604794	0.38113	208
COA7	-0.847808	-0.42576	0.422048	209	TRIM8	-0.322771	0.184823	0.507594	209	FAM46A	-0.123834	0.472476	0.59631	209	AMBRA1	-0.0332927	0.347428	0.38072	209
RNMTL1	-1.15821	-0.736535	0.421674	210	RAB10	-0.133852	0.372902	0.506754	210	TMEM243	-0.238362	0.357813	0.596175	210	DDX55	-1.25307	-0.872516	0.380556	210
ENAH	0.011802	0.43332	0.421518	211	SKA2	-0.541294	-0.0359171	0.505377	211	MEN1	-0.169493	0.425378	0.594872	211	UFSP2	-0.949666	-0.569209	0.380457	211
KMT2A	-0.938106	-0.516606	0.421499	212	CCNT1	-0.364488	0.140844	0.505332	212	GLYATL3	-0.208747	0.385234	0.593982	212	GNL2	-0.828187	-0.447864	0.380323	212
MT1H	-0.101617	0.319447	0.421063	213	CNBP	-0.372256	0.132999	0.505256	213	KIAA1598	0.151118	0.743438	0.592321	213	INO80	0.161068	0.540951	0.379883	213
PITRM1	-0.322644	0.098369	0.421013	214	TDG	-0.112334	0.392613	0.504947	214	PLXND1	-0.221568	0.369395	0.590963	214	ZNF74	-0.650253	-0.271541	0.378712	214
MED30	-0.860571	-0.440378	0.420194	215	RANBP2	-0.220214	0.283236	0.503451	215	KDF1	-0.113231	0.477022	0.590253	215	MRPL47	-0.731815	-0.354068	0.377747	215
MAPK3	-0.124491	0.295047	0.419538	216	TMOD2	-0.185136	0.317397	0.502533	216	SPRTN	-0.429414	0.159818	0.589231	216	KCNG3	0.181598	0.558218	0.37662	216
VPS51	-0.697005	-0.277631	0.419373	217	GDPD5	-0.465383	0.0348592	0.500242	217	PCDHAC2	-0.0693313	0.519806	0.589137	217	WDFY4	-0.21906	0.15749	0.37655	217
MPDU1	-0.433209	-0.0145715	0.418637	218	U2SURP	-0.639912	-0.139749	0.500163	218	GHRHR	0.106873	0.695288	0.588415	218	CDKN2AIP	-0.276497	0.0994743	0.375971	218
YY1	-1.01331	-0.594715	0.418599	219	HIC2	-0.154006	0.345561	0.499567	219	RERG	-0.0371254	0.55061	0.587735	219	BTN3A3	-0.0844612	0.291246	0.375707	219
AGAP6	-0.272734	0.145547	0.418281	220	CWF19L2	-0.427315	0.0701326	0.497448	220	TADA3	-0.616983	-0.0303843	0.586599	220	KNTC1	-0.190685	0.184757	0.375441	220
GAR1	-0.369658	0.0482582	0.417916	221	ZMYND12	-0.266209	0.230765	0.496974	221	CEP162	-0.028288	0.558231	0.586519	221	BOLA2	-0.664002	-0.289634	0.374368	221
MED12	-0.836425	-0.419056	0.417369	222	CAMTA1	-0.207163	0.289577	0.49674	222	IFT20	0.146519	0.731541	0.585022	222	TM9SF3	0.40613	0.78045	0.374321	222
DDX19A	-0.702442	-0.285087	0.417355	223	DDX59	-0.943714	-0.448512	0.495202	223						RWDD3	-0.129914	0.24365	0.373564	223
DHX35	-0.812554	-0.395231	0.417324	224	DSCR3	-0.00968555	0.483144	0.492829	224						HCK	-0.0592738	0.313457	0.372731	224
MRPL2	-0.747738	-0.330489	0.417249	225	DAK	-0.169698	0.32259	0.492288	225						TRIM43	-0.123661	0.247539	0.3712	225
CNNM1	-0.291263	0.125702	0.416965	226	SMNDC1	-1.50763	-1.01592	0.491712	226						TMEM200C	0.167022	0.538207	0.371184	226
PSMD2	-1.05522	-0.639198	0.416024	227	NHEJ1	-1.03774	-0.546801	0.490936	227						METTL3	-1.13464	-0.76367	0.370968	227
ENKUR	-0.104293	0.310994	0.415287	228	DCP1A	-0.0148637	0.473081	0.487945	228						RPTOR	-1.38825	-1.01735	0.3709	228
SEC62	-0.146907	0.268022	0.414929	229	MAD2L1BP	-0.580849	-0.094501	0.486348	229						TOMM70A	-0.876962	-0.506141	0.370822	229
CHGA	-0.406475	0.00742996	0.413905	230	UBR5	-1.08041	-0.594359	0.486047	230						OPN3	0.101378	0.472195	0.370817	230
GPR83	-0.0949339	0.318632	0.413566	231	TASP1	-0.411319	0.0742681	0.485587	231						NKIRAS1	-0.0506132	0.319763	0.370376	231
EIF1	-0.710435	-0.297206	0.413229	232	CDKN1B	0.394159	0.877643	0.483483	232						ACTR1A	-1.66076	-1.29055	0.370212	232
CENPB	0.277374	0.690331	0.412957	233	BIRC6	-0.243137	0.240327	0.483464	233						BPIFC	-0.0635107	0.305838	0.369349	233
SLC25A19	-0.475568	-0.0634393	0.412129	234	PNPLA4	-0.0299346	0.452002	0.481937	234						RPS19	-0.999315	-0.630981	0.368334	234
DGUOK	0.180744	0.592712	0.411968	235	CAD	-1.58964	-1.10832	0.481322	235						COPB2	-0.777881	-0.410212	0.367669	235
ELF2	0.0873645	0.499196	0.411832	236	AKAP8	-0.225224	0.253332	0.478556	236						CNOT7	-0.18781	0.179474	0.367284	236
NOV	-0.235702	0.175978	0.41168	237	ARIH1	-0.943271	-0.464887	0.478384	237						TANK	0.316964	0.683873	0.366908	237
HNRNPH1	-0.797989	-0.387118	0.410871	238	ZCCHC8	-0.263417	0.214832	0.478248	238						ARMC5	-0.737748	-0.371205	0.366543	238
CLNS1A	-0.401546	0.00903025	0.410576	239	CTNNBL1	-1.13759	-0.659498	0.478094	239						PEX14	0.0685666	0.435094	0.366527	239
FAM96B	-0.830685	-0.422249	0.408437	240	HAUS4	-1.02345	-0.545385	0.478064	240						UQCC1	-0.330879	0.03534	0.366219	240
CCDC132	-0.162517	0.245006	0.407524	241	ZNF143	-1.22185	-0.743896	0.477956	241						SAMHD1	-0.0395474	0.326489	0.366036	241
SDHB	-1.47415	-1.06697	0.407186	242	OR51M1	-0.278211	0.198881	0.477092	242						MGAT1	-0.765926	-0.400348	0.365579	242
EIF3CL	-1.30482	-0.898504	0.406314	243	DNAJC7	-0.548114	-0.0719268	0.476187	243						KDM3B	0.409003	0.774337	0.365335	243
PES1	-0.963159	-0.557086	0.406073	244	CEP295	-0.632886	-0.157265	0.475621	244						CRTC3	0.0234163	0.387304	0.363888	244
SPATA31D3	-0.169757	0.235904	0.405661	245	INCENP	-1.08182	-0.606277	0.475544	245						TOP1	-1.42273	-1.05928	0.363453	245
WDR63	0.204691	0.610162	0.405471	246	NBEAL2	-0.0812972	0.393915	0.475213	246						ADAM21	-0.124196	0.238937	0.363134	246
GTPBP3	-0.490289	-0.0854865	0.404802	247	GTSE1	-0.76068	-0.285569	0.475111	247						ANLN	-0.660259	-0.297986	0.362274	247
SMARCD1	-0.772636	-0.367962	0.404674	248	ZNF706	-0.0256685	0.449282	0.47495	248						DNM2	-0.846625	-0.484638	0.361987	248
NOL10	-1.4186	-1.01502	0.403582	249	TNRC6B	-0.0886865	0.385595	0.474282	249						DHX29	-0.607905	-0.246324	0.361581	249
CNOT11	-0.372169	0.0308741	0.403043	250	DRG2	-0.565023	-0.0909348	0.474088	250						ACTL6A	-1.27555	-0.913993	0.361558	250
TMPRSS3	-0.00388889	0.398717	0.402606	251	RPAP3	-0.913148	-0.43916	0.473988	251						ARID1B	-0.244757	0.11641	0.361167	251
PCGF2	-0.366116	0.0364199	0.402536	252	MRTO4	-1.05692	-0.584824	0.472101	252						ANAPC1	-0.662642	-0.301534	0.361108	252
NBEAL2	0.300706	0.702952	0.402245	253	ZSCAN16	-0.277044	0.194164	0.471207	253						CHPF	-0.0103614	0.350486	0.360848	253
MTUS2	-0.0496845	0.352515	0.4022	254	FAM73B	-0.477209	-0.00626489	0.470944	254						ZBTB14	0.0636717	0.424429	0.360757	254
PHF20	-0.366346	0.0356564	0.402002	255	EIF3H	-1.19054	-0.720079	0.470457	255						DEFB132	-0.00430819	0.356414	0.360722	255
PISD	-0.982577	-0.580576	0.402001	256	ARMC7	-0.565245	-0.0972459	0.467999	256						MYBBP1A	-0.88633	-0.526496	0.359834	256
KLHL15	0.443738	0.845723	0.401985	257	DYRK1A	-0.1379	0.329944	0.467845	257						CFAP57	-0.161756	0.197859	0.359615	257
KIAA1377	0.0592943	0.460951	0.401657	258	COG3	-0.686895	-0.21914	0.467755	258						MAP4K1	-0.209042	0.150512	0.359553	258
MYCN	-0.0829694	0.318529	0.401499	259	C2CD3	-0.443348	0.0242379	0.467586	259						MLPH	-0.0567162	0.302811	0.359528	259
PDZD8	0.0475647	0.448858	0.401294	260	EPC1	-0.239416	0.228064	0.46748	260						FAM72C	-0.242603	0.116867	0.35947	260
RIC1	-0.453304	-0.052738	0.400566	261	TMEM189	0.0233758	0.490455	0.46708	261						NOP2	-1.45137	-1.09286	0.358506	261
RTF1	-1.18295	-0.78261	0.40034	262	OSBPL3	-0.41681	0.0493953	0.466206	262						ASNA1	-0.645992	-0.287498	0.358494	262
NUP54	-0.325853	0.0744393	0.400292	263	MRPL19	-0.648787	-0.184093	0.464695	263						AQR	-1.31096	-0.952793	0.358164	263
SNAP23	-0.207831	0.191792	0.399623	264	OR51A7	-0.414543	0.0500171	0.46456	264						IPMK	-0.181364	0.175881	0.357245	264
SUCLA2	-0.0818473	0.316547	0.398394	265	INTS4	-1.06752	-0.602979	0.464539	265						SLC16A1	-0.193842	0.163118	0.35696	265
AHCTF1	-0.930469	-0.532113	0.398357	266	NDE1	-0.514018	-0.0496068	0.464412	266						OSBPL8	-0.133162	0.223596	0.356758	266
OR6V1	-0.0985067	0.299026	0.397533	267	INPPL1	-0.126184	0.338079	0.464263	267						WIBG	0.11227	0.468817	0.356546	267
SLC4A10	0.0726829	0.470139	0.397457	268	ZNF280C	0.10317	0.567303	0.464133	268						ABHD16A	-0.240519	0.115874	0.356393	268
PLCB3	-0.56919	-0.172121	0.397069	269	TOB1	-0.678434	-0.216579	0.461855	269						GGN	-0.371016	-0.0147161	0.3563	269
MOGAT2	-0.198747	0.198131	0.396878	270	SKA1	-0.143245	0.318547	0.461792	270						FXN	-0.637079	-0.282151	0.354928	270
LEAP2	0.189122	0.585885	0.396763	271	ZMYND8	-0.338856	0.122311	0.461167	271						SMC1B	0.355971	0.710804	0.354833	271
ALG1L2	-0.372201	0.0242276	0.396428	272	MTR	-0.441943	0.0190269	0.46097	272						KIRREL	0.185392	0.540085	0.354693	272
MSL2	-0.2154	0.180481	0.395882	273	CSNK2B	-1.35474	-0.894896	0.459839	273						LARP4B	-0.141537	0.210565	0.352102	273
ONECUT2	0.10462	0.500127	0.395507	274	BTNL9	-0.563788	-0.105644	0.458144	274						PROX1	0.065162	0.416973	0.351811	274
SREBF1	-0.732158	-0.336919	0.395239	275	PGK1	-1.49893	-1.04133	0.457606	275						YTHDF2	-0.443904	-0.0922603	0.351643	275
IK	-0.889115	-0.49473	0.394385	276	GPBP1	-0.24808	0.20889	0.45697	276						VARS	-1.33473	-0.983195	0.351531	276
CPSF6	-0.126622	0.267267	0.39389	277	NUP133	-0.932073	-0.475941	0.456132	277						MYC	-2.10516	-1.75403	0.351133	277
NUP85	-1.31362	-0.92004	0.393581	278	ANGPTL4	-0.360509	0.0950107	0.45552	278						MRPL15	-1.23905	-0.887985	0.35107	278
IL12RB1	-0.483409	-0.0903115	0.393098	279	COA7	-1.08436	-0.6297	0.454664	279						RNF7	-0.139963	0.211062	0.351025	279
TERT	-0.781221	-0.388625	0.392596	280	CLPP	-0.442711	0.0113442	0.454055	280						GRIN1	-0.0528673	0.297562	0.35043	280
					LDB1	-0.020765	0.433272	0.454037	281						KRT32	-0.326512	0.0238698	0.350382	281
					TRIP13	-0.536314	-0.0823055	0.454009	282
					HYDIN	-0.641771	-0.188563	0.453208	283
					LARP1	-0.25995	0.192885	0.452834	284
					OR8K1	-0.169169	0.283602	0.452771	285
					UBE4A	0.210145	0.6621	0.451955	286
					PBRM1	-0.606109	-0.154606	0.451503	287
					CBX5	-0.257008	0.194072	0.45108	288
					MIEF1	-0.789162	-0.338493	0.450669	289
					CDKL1	-0.237427	0.212578	0.450005	290
					HERC1	-0.136265	0.31332	0.449586	291
					ZMIZ1	-0.507466	-0.0586212	0.448845	292
					ACVR1	-0.573473	-0.12474	0.448733	293
					RBM17	-1.3207	-0.872946	0.44775	294
					SCYL1	-0.327236	0.120426	0.447662	295
					B3GALT6	-0.367014	0.08058	0.447594	296
					SPC25	-0.763107	-0.316615	0.446491	297
					ZCCHC17	-0.21271	0.233458	0.446168	298
					EPS15	-0.246916	0.19923	0.446146	299
					DENND2D	-0.287964	0.15788	0.445843	300
					CDK2AP2	-0.277687	0.167463	0.44515	301
					PHLDB1	-0.418133	0.0260004	0.444134	302
					ARHGAP28	-0.218425	0.225333	0.443758	303
					ZC3H10	-0.718304	-0.274945	0.443359	304
					SCAF1	-0.484844	-0.0415581	0.443286	305
					TRMT6	-1.33904	-0.896732	0.442303	306
					MBTPS2	-0.249457	0.192633	0.44209	307
					H2AFY	0.218931	0.660361	0.441431	308
					PDCD11	-1.00426	-0.563164	0.441096	309
					SERPINA12	-0.176778	0.263943	0.440721	310
					ARID2	-0.271375	0.168675	0.440049	311
					FAM72C	-0.09473	0.345162	0.439892	312
					IFT122	-0.384272	0.0554362	0.439708	313
					RHAG	-0.103518	0.335796	0.439314	314
					CFAP52	-0.157128	0.282016	0.439145	315
					OIP5	-1.63416	-1.19664	0.437514	316
					RPS6KB1	-0.452047	-0.015337	0.43671	317
					WRAP53	-1.11901	-0.682977	0.436033	318
					ATP6V1C1	-0.646763	-0.210894	0.435869	319
					RPL11	-2.07896	-1.64435	0.434616	320
					HADHB	-0.72784	-0.293744	0.434096	321
					TMOD3	-0.182242	0.251285	0.433527	322
					HES1	0.0258645	0.45913	0.433265	323
					KIAA2018	-0.199212	0.233764	0.432976	324
					PFKM	-0.491823	-0.0592713	0.432552	325
					GCLM	-0.13021	0.30228	0.43249	326
					GSG2	-0.459153	-0.0272834	0.43187	327
					EP400	-0.513789	-0.0822399	0.431549	328
					G3BP1	-0.784457	-0.35369	0.430766	329
					PGP	-0.840608	-0.409992	0.430616	330
					PDXK	-0.131298	0.299048	0.430346	331
					USF2	-0.475496	-0.0451675	0.430328	332
					MAPKBP1	-0.157486	0.272585	0.430071	333
					NUMB	-0.304499	0.125283	0.429781	334
					ING5	-0.308072	0.12081	0.428882	335
					OR13C3	-0.023814	0.404728	0.428542	336
					NDC1	-0.395588	0.0328918	0.42848	337
					ACO2	-1.11835	-0.691198	0.427152	338
					NUDT19	-0.0363627	0.389166	0.425529	339
					NCLN	-0.357076	0.0679781	0.425054	340
					BCL9L	-0.408138	0.0168893	0.425028	341
					BRIP1	-0.0650833	0.359592	0.424675	342
					VBP1	-0.342308	0.0814007	0.423708	343
					CRLS1	-0.832305	-0.408749	0.423555	344
					ATP5O	-1.396	-0.972474	0.423529	345
					FMNL1	-0.348958	0.0745603	0.423518	346
					KLHL3	-0.124135	0.298392	0.422526	347
